# Supplementary material for: The evolutionary origins of the cat attractant nepetalactone in catnip
Source: PubMed Central journal article supplement — Sci Adv. 2020 May 13;6(20):eaba0721. doi: 10.1126/sciadv.aba0721 (PMC7220310; doi:10.1126/sciadv.aba0721), 2020-05-13
Supplement: aba0721_SM.pdf [file aba0721_SM.pdf]

## Supplementary Materials for

### **The evolutionary origins of the cat attractant nepetalactone in catnip**

Benjamin R. Lichman\*, Grant T. Godden, John P. Hamilton, Lira Palmer, Mohamed O. Kamileen, Dongyan Zhao, Brieanne Vaillancourt, Joshua C. Wood, Miao Sun, Taliesin J. Kinser, Laura K. Henry, Carlos Rodriguez-Lopez, Natalia Dudareva, Douglas E. Soltis, Pamela S. Soltis, C. Robin Buell\*, Sarah E. O'Connor\*

\*Corresponding author. Email: benjamin.lichman@york.ac.uk (B.R.L.); buell@msu.edu (C.R.B.); oconnor@ice.mpg.de (S.E.O.)

Published 13 May 2020, *Sci. Adv.* **6**, eaba0721 (2020)  
DOI: 10.1126/sciadv.aba0721

#### **This PDF file includes:**

Figs. S1 to S28  
Tables S1 to S10  
References

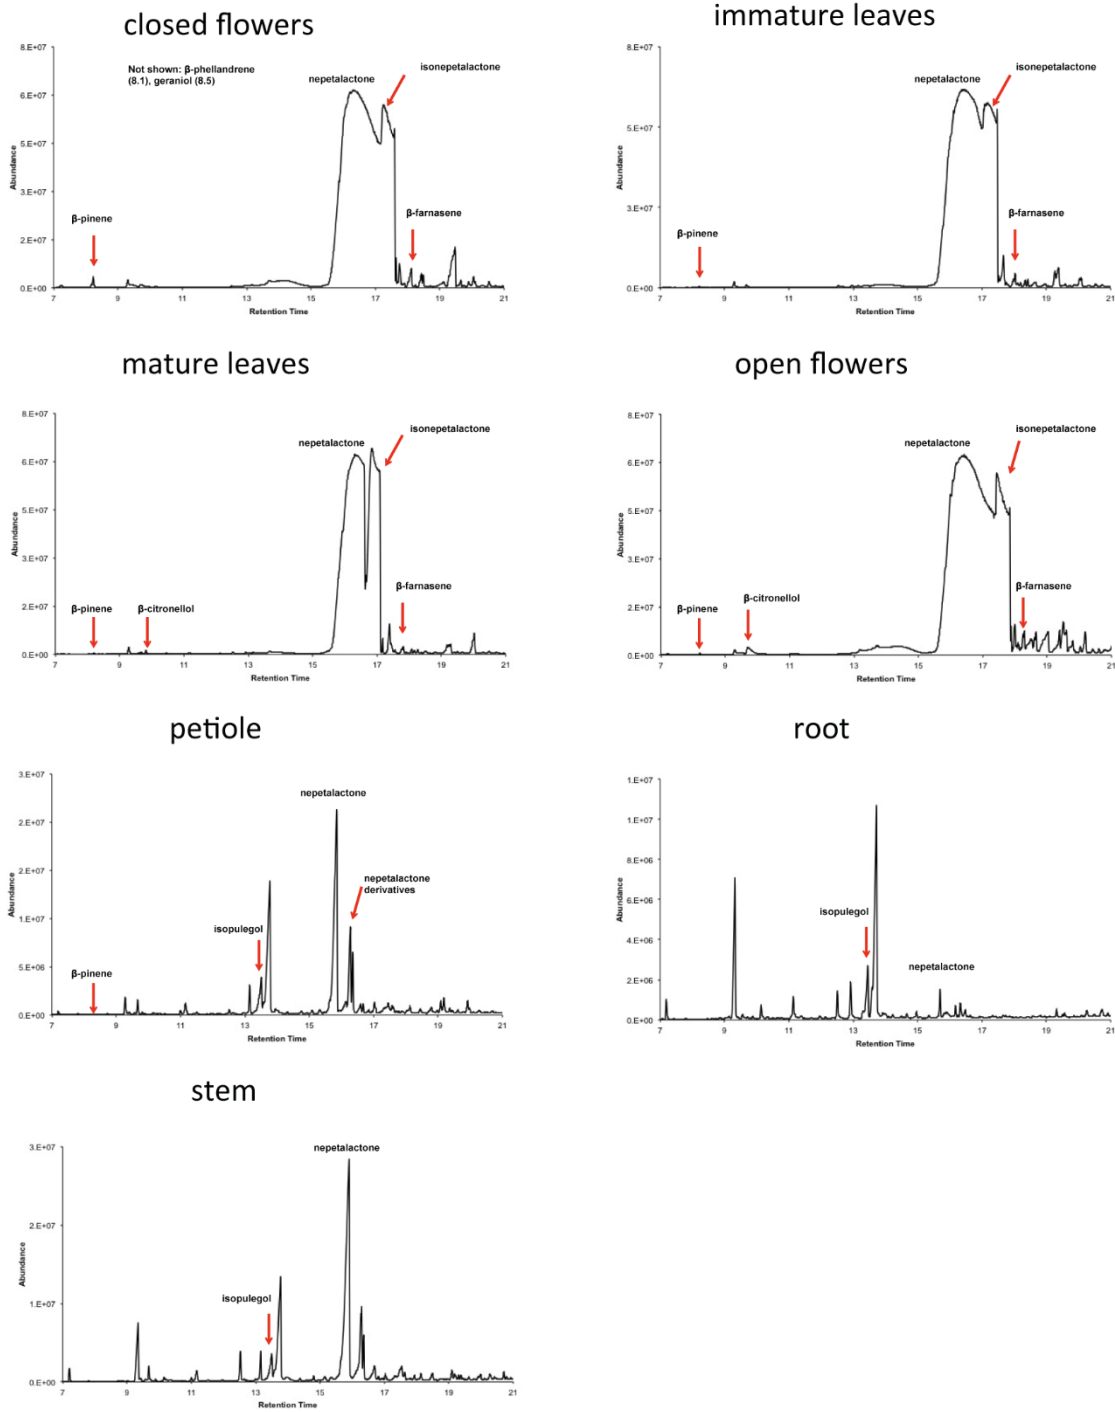

**Fig. S1. GC-MS analysis of *Nepeta cataria* tissues.**

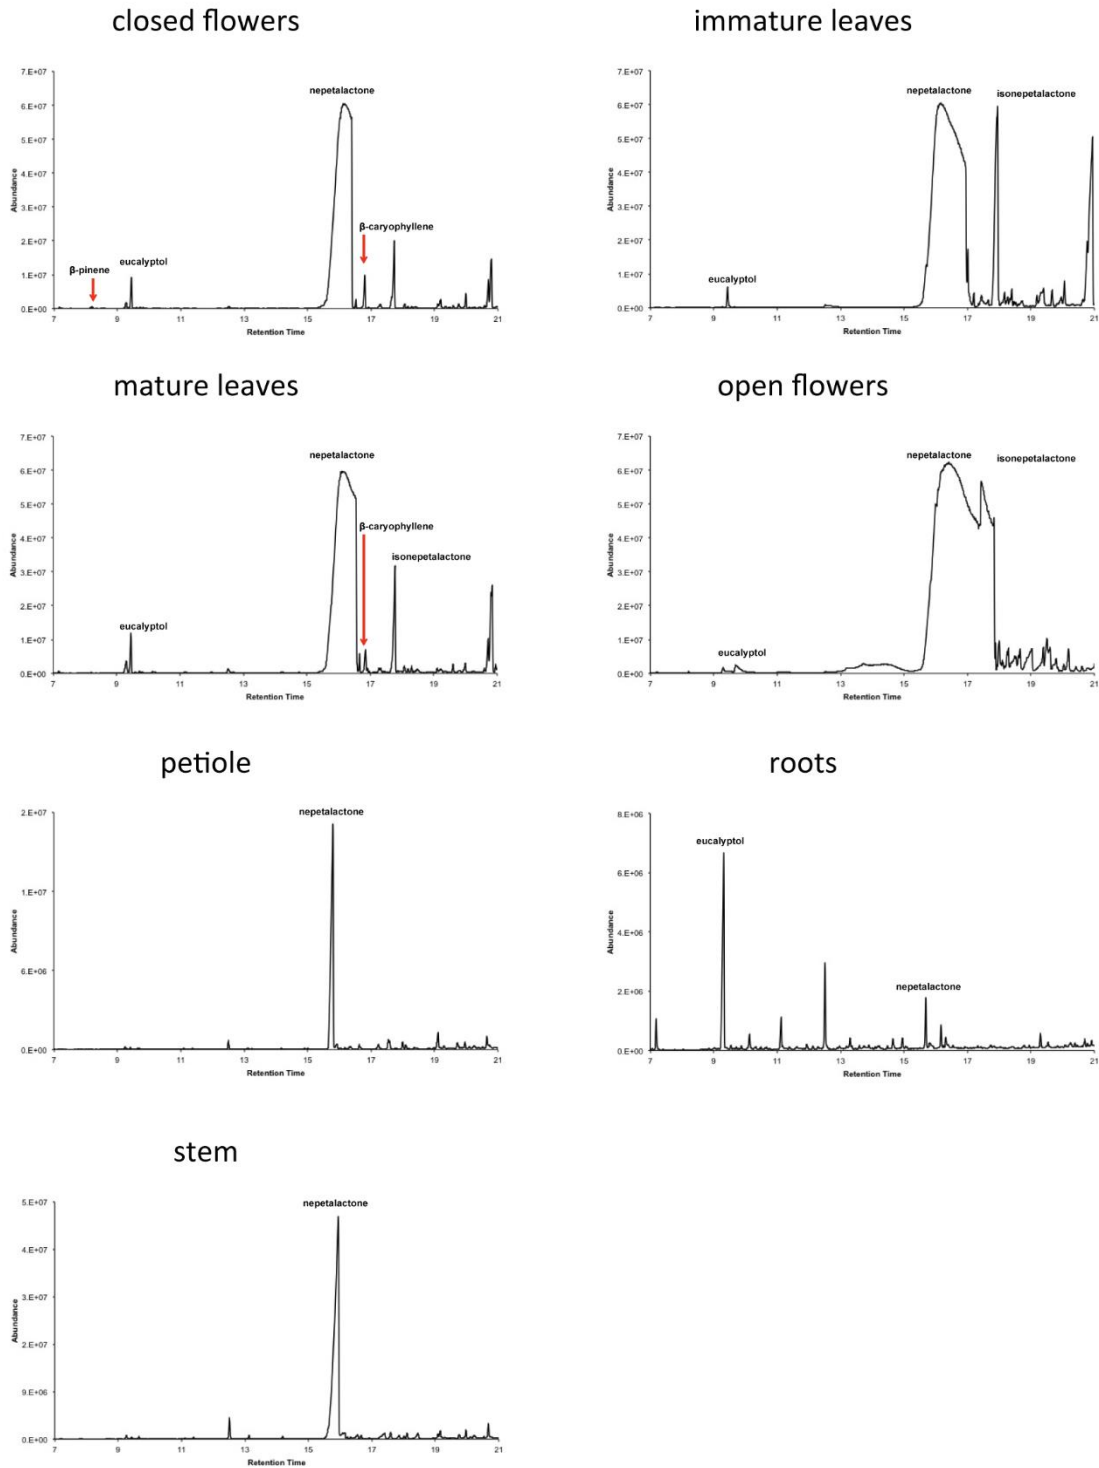

**Fig. S2. GC-MS analysis of *Nepeta mussinii* tissues.**

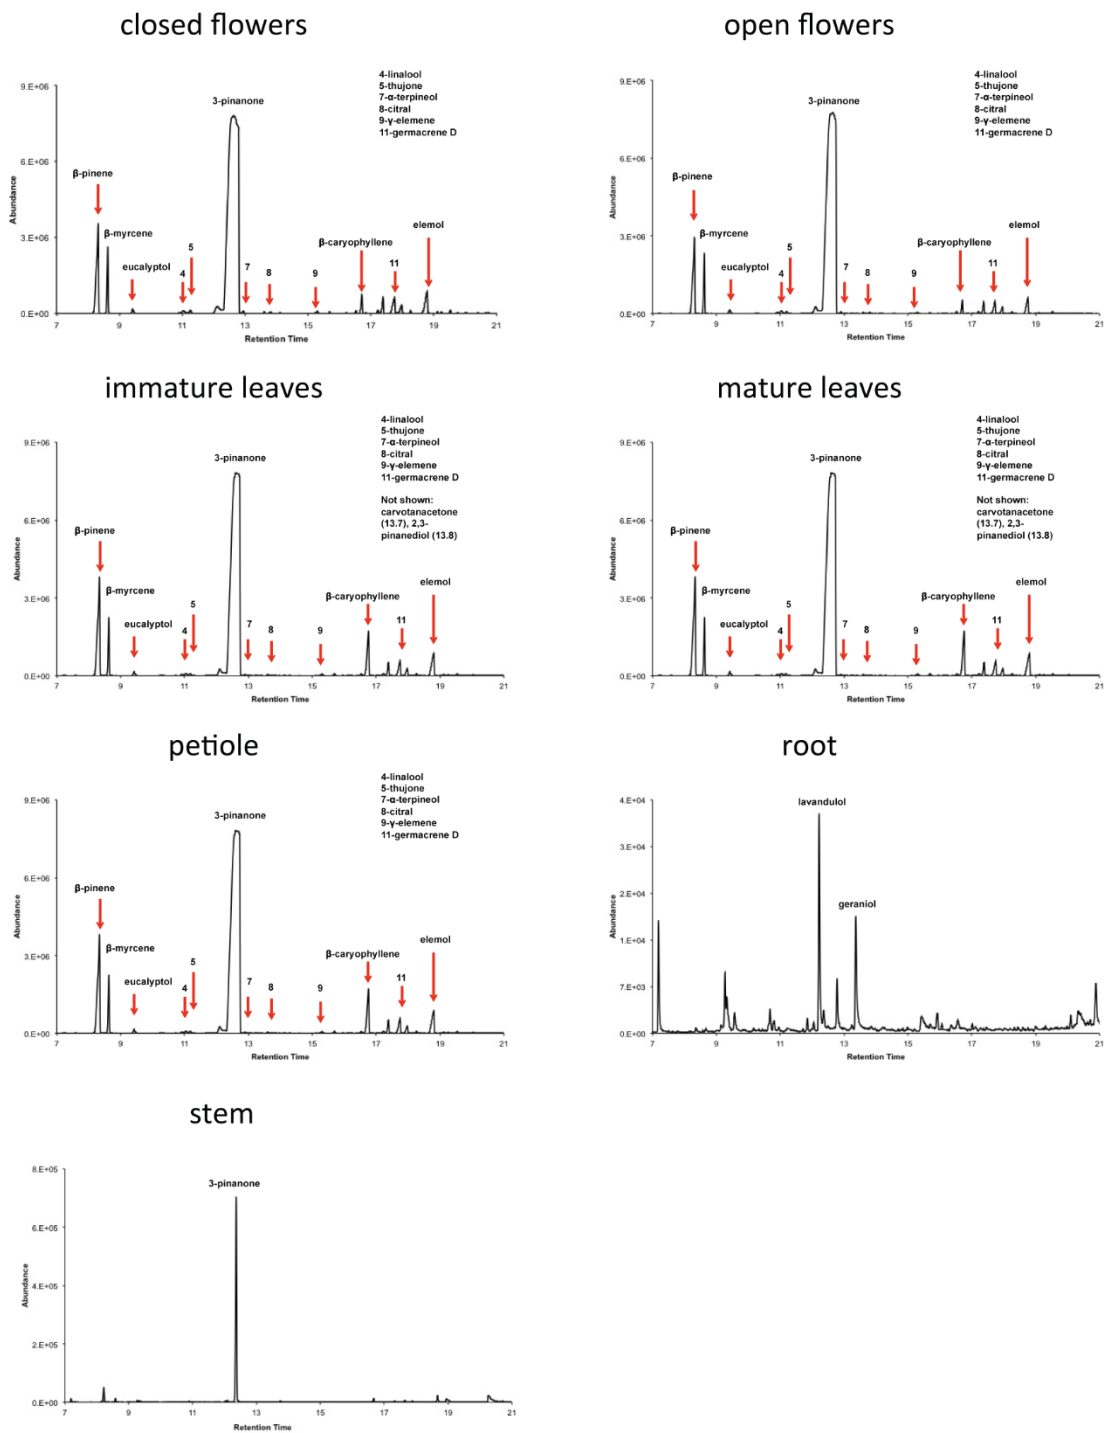

**Fig. S3. GC-MS analysis of *Hyssopus officinalis* tissues.**

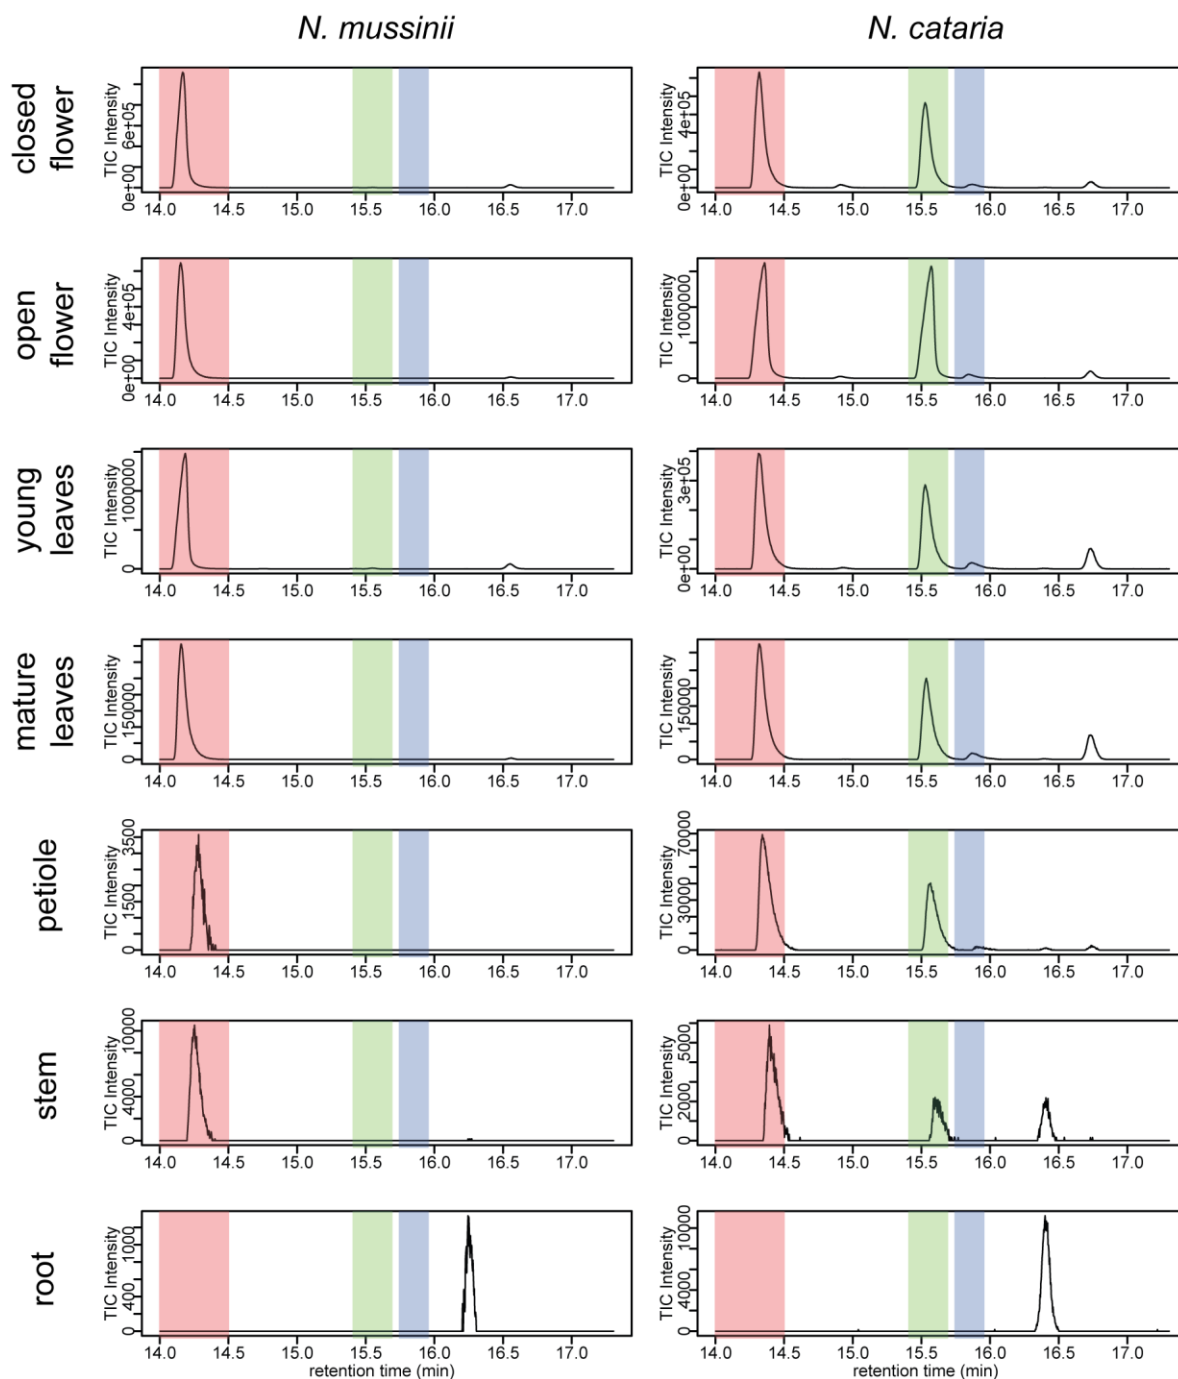

**Fig. S4. Nepetalactone content of *Nepeta* tissues.** Analysis conducted by GC-MS analysis, with the total ion chromatograms (TICs) depicted. Pink peak: cis-trans-nepetalactone; green peak: trans-cis-nepetalactone; lilac peak: cis-cis-nepetalactone.

*Nepeta cataria*

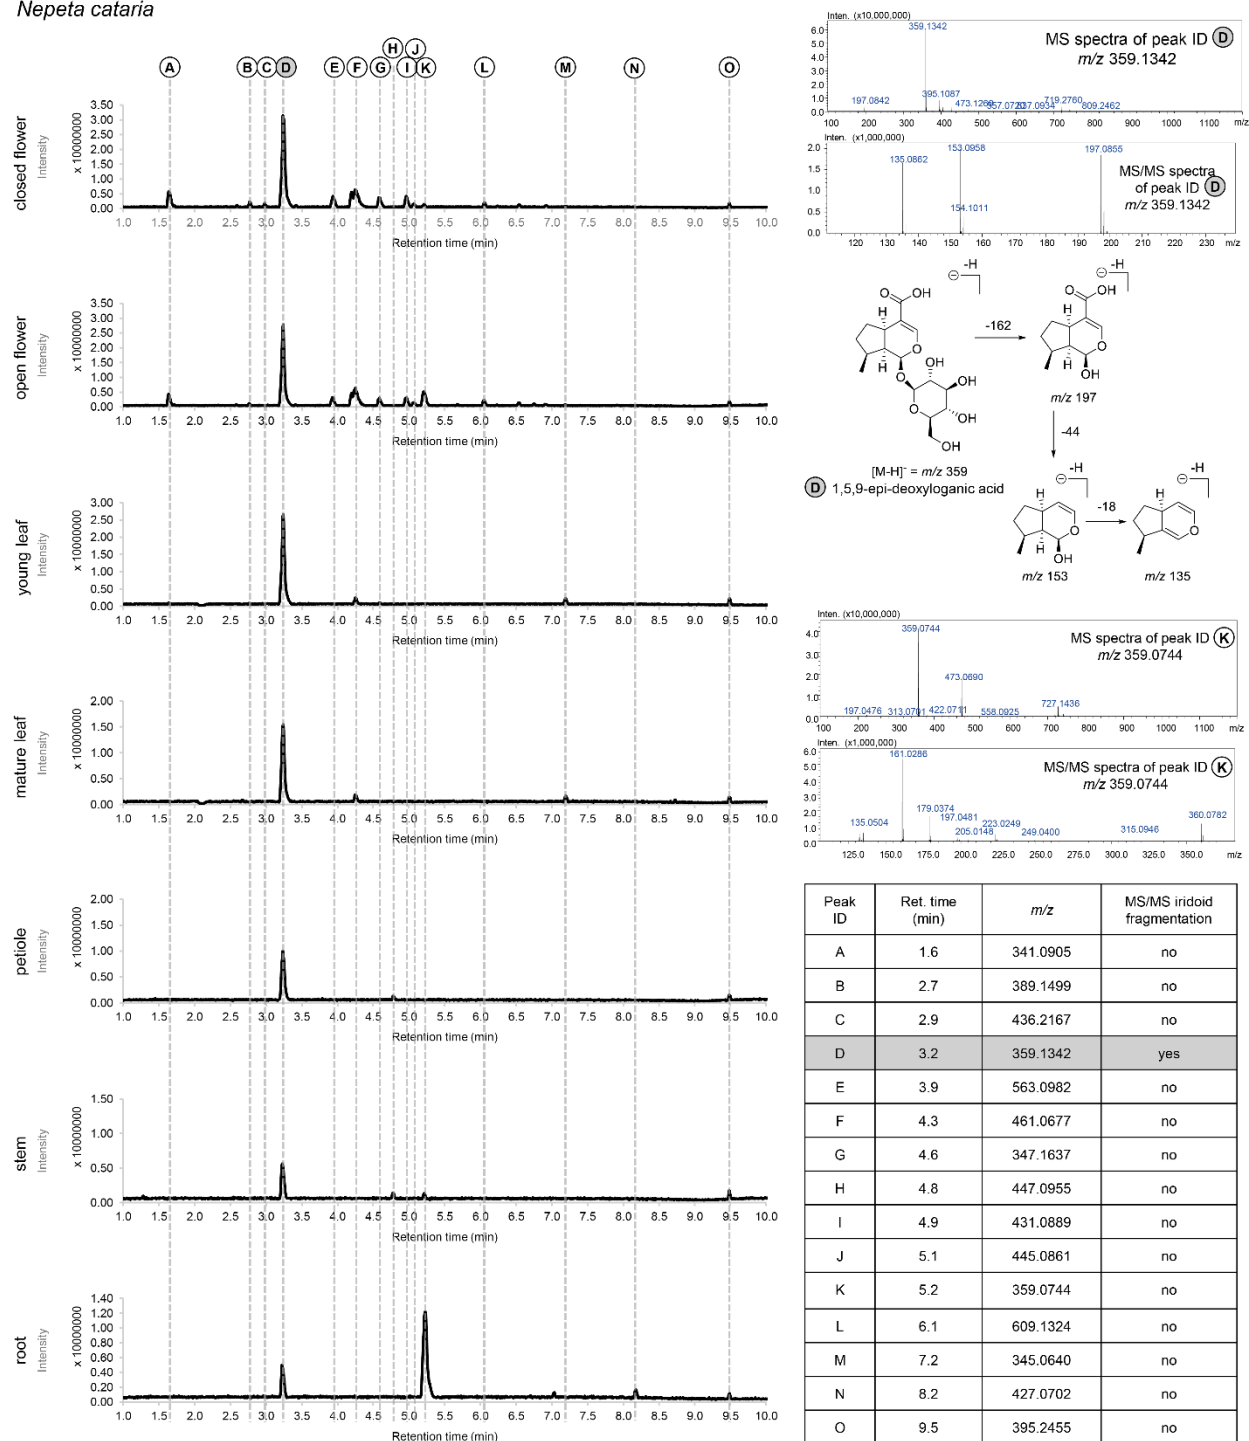

**Fig. S5. LC-MS analysis of *N. cataria* tissues.** Untargeted tandem mass LC-MS (-ESI) analysis of *N. cataria* tissues resulted in the tentative identification of an iridoid glucoside 1,5,9-epi-deoxyloganic acid (D; highlighted in grey). The MS/MS spectra of peak K ( $m/z$  359) was different from that of D and observed to be of a typical flavonoid glucoside. Chromatograms are total ion chromatograms (TICs).

*Nepeta mussinii*

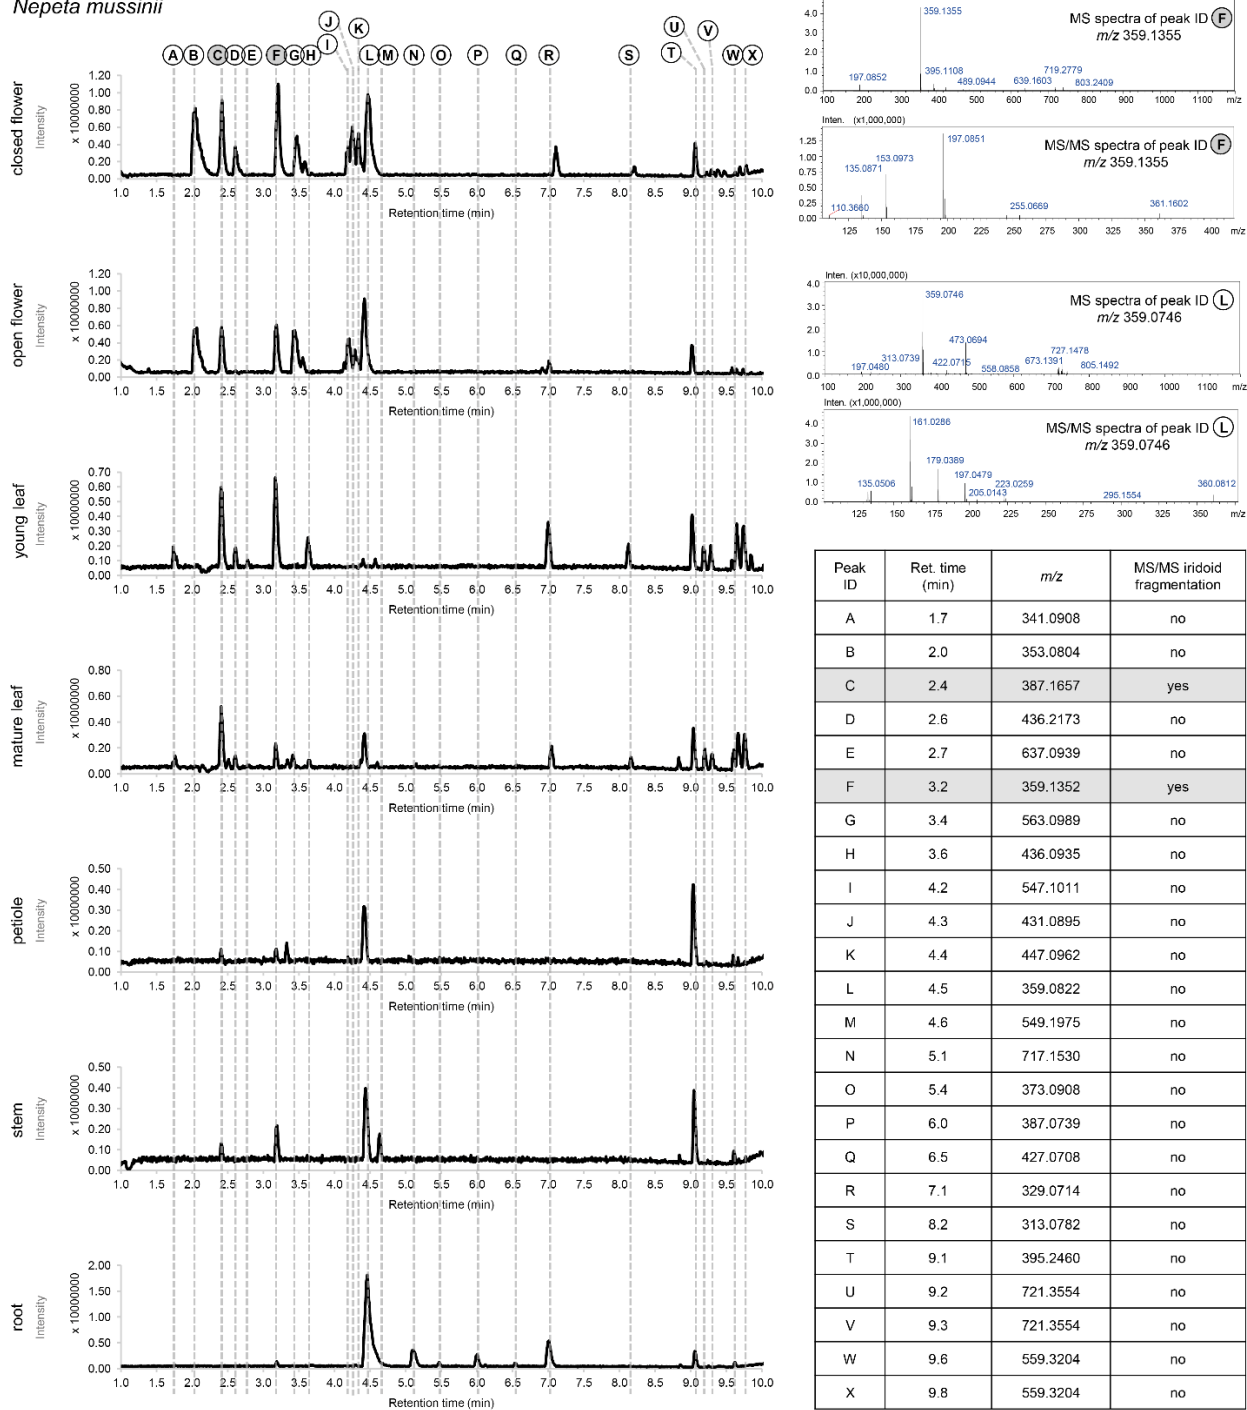

**Fig. S6. LC-MS analysis of *N. mussinii* tissues.** Untargeted tandem mass LC-MS (-ESI) analysis of *N. mussinii* tissues resulted in the tentative identification of two iridoid glucosides (highlighted in grey), 2-O-methyl-1,5,9-epi-deoxyloganic acid (C) and 1,5,9-epi-deoxyloganic acid (F). MS/MS spectra of C and F were similar to *N. cataria* compound D (fig. S5). An isomer of the *N. cataria* flavonoid glucoside K (Fig S5) was tentatively observed in peak L with similar MS/MS spectra. Chromatograms are total ion chromatograms (TICs).

*Hyssopus officinalis*

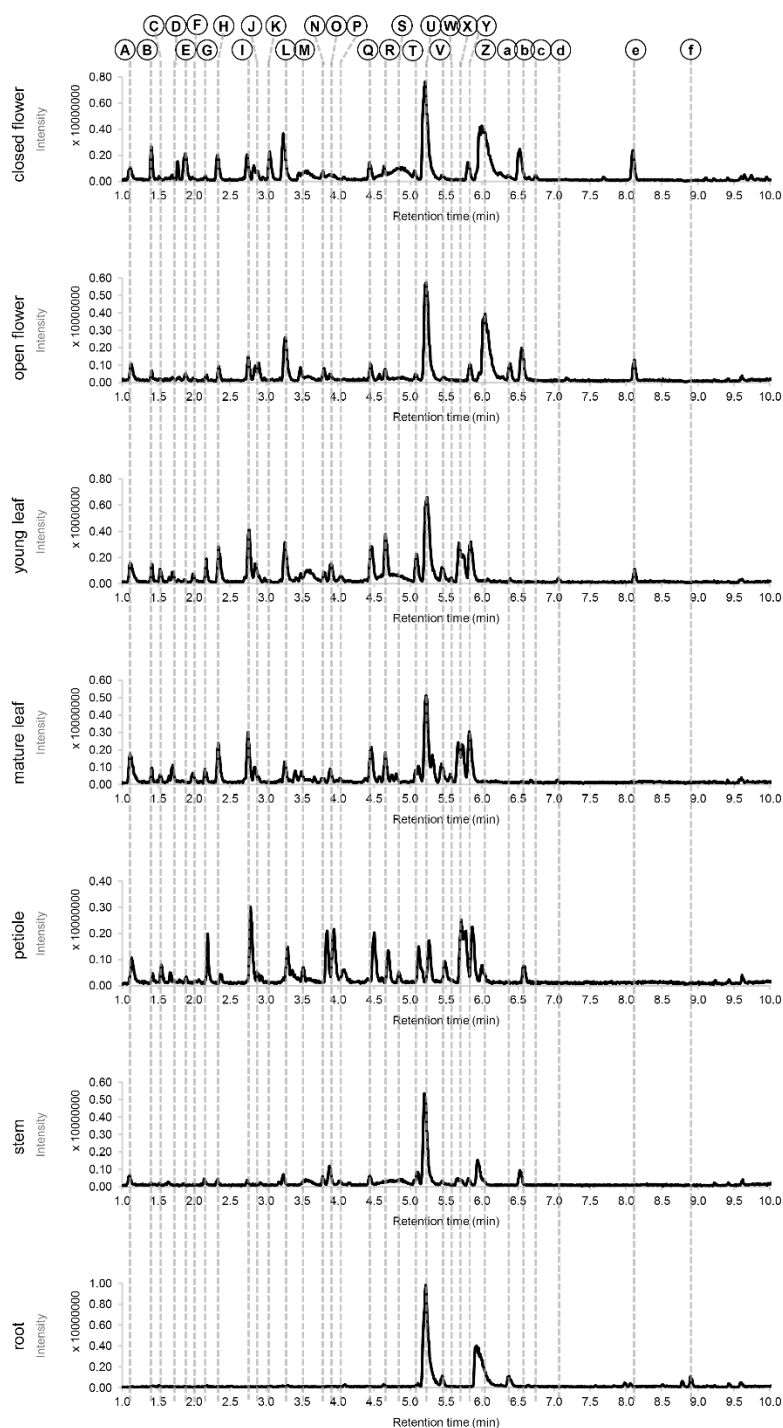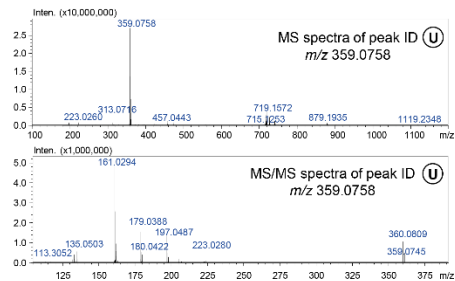

| Peak ID | Ret. time (min) | m/z       | MS/MS iridoid fragmentation |
|---------|-----------------|-----------|-----------------------------|
| A       | 1.2             | 405.1365  | no                          |
| B       | 1.4             | 395.0990  | no                          |
| C       | 1.5             | 315.1124  | no                          |
| D       | 1.7             | 371.0950  | no                          |
| E       | 1.8             | 368.1004  | no                          |
| F       | 2.0             | 297.0662  | no                          |
| G       | 2.3             | 353.0816  | no                          |
| H       | 2.7             | 387.1680  | no                          |
| I       | 2.8             | 311.0690  | no                          |
| J       | 3.1             | 436.2186  | no                          |
| K       | 3.2             | 305.0722  | no                          |
| L       | 3.3             | 305.0772  | no                          |
| M       | 3.5             | 537.1130  | no                          |
| N       | 3.9             | 453.1926  | no                          |
| O       | 4.0             | 539.1252  | no                          |
| P       | 4.1             | 539.1252  | no                          |
| Q       | 4.4             | 509.1685  | no                          |
| R       | 4.7             | 457.1726  | no                          |
| S       | 4.8             | 437.1152  | no                          |
| T       | 5.1             | 517.1997  | no                          |
| U       | 5.2             | 359.0834  | no                          |
| V       | 5.5             | 1030.4192 | no                          |
| W       | 5.6             | 457.2125  | no                          |
| X       | 5.7             | 421.1176  | no                          |
| Y       | 5.8             | 535.1909  | no                          |
| Z       | 6.1             | 717.1548  | no                          |
| a       | 6.4             | 373.0921  | no                          |
| b       | 6.6             | 637.1663  | no                          |
| c       | 6.7             | 701.1590  | no                          |
| d       | 7.1             | 455.1406  | no                          |
| e       | 8.2             | 329.0724  | no                          |
| f       | 8.9             | 725.3961  | no                          |

**Fig. S7. LC-MS analysis of *H. officinalis* tissues.** Untargeted tandem mass LC-MS (-ESI) analysis of *H. officinalis* tissues failed to identify any iridoid glucosides. MS/MS spectra of peak U ( $m/z$  359) was observed as a flavonoid glucoside with similar MS/MS to *N. cataria* peak K (Fig. S5), and *N. mussinii* peak L (Fig. S6). Chromatograms are total ion chromatograms (TICs).



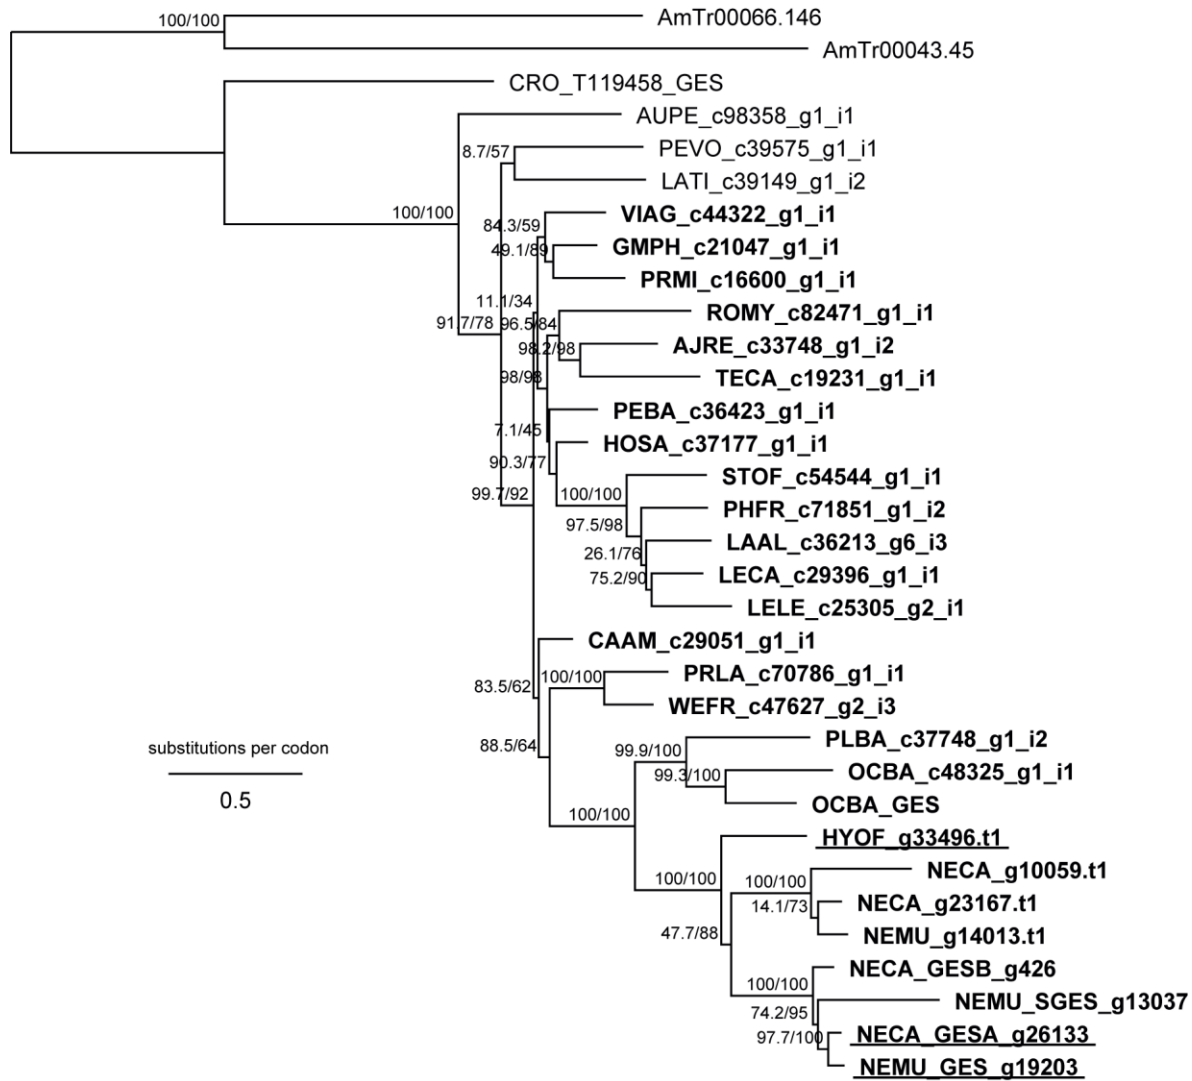

**Fig. S8. Geraniol synthase (GES) phylogeny.** Lamiaceae sequences in bold, assayed sequences underlined. Sequences obtained by orthogroup analysis (OG0011057) and supplemented with sequences from the genomes. *C. roseus* GES (CRO) and *Ocimum basilicum* GES (OCBA\_GES) have previously been characterised. Tree inference with iQTree. Support values are SH-aLRT support (%) / ultrafast bootstrap support (%). Outgroups are sequences from *Amborella trichopoda*. Active GES genes in *Nepeta* are orthologous to the *C. roseus* gene (CRO\_T119458). Species acronyms can be found in Table S5.

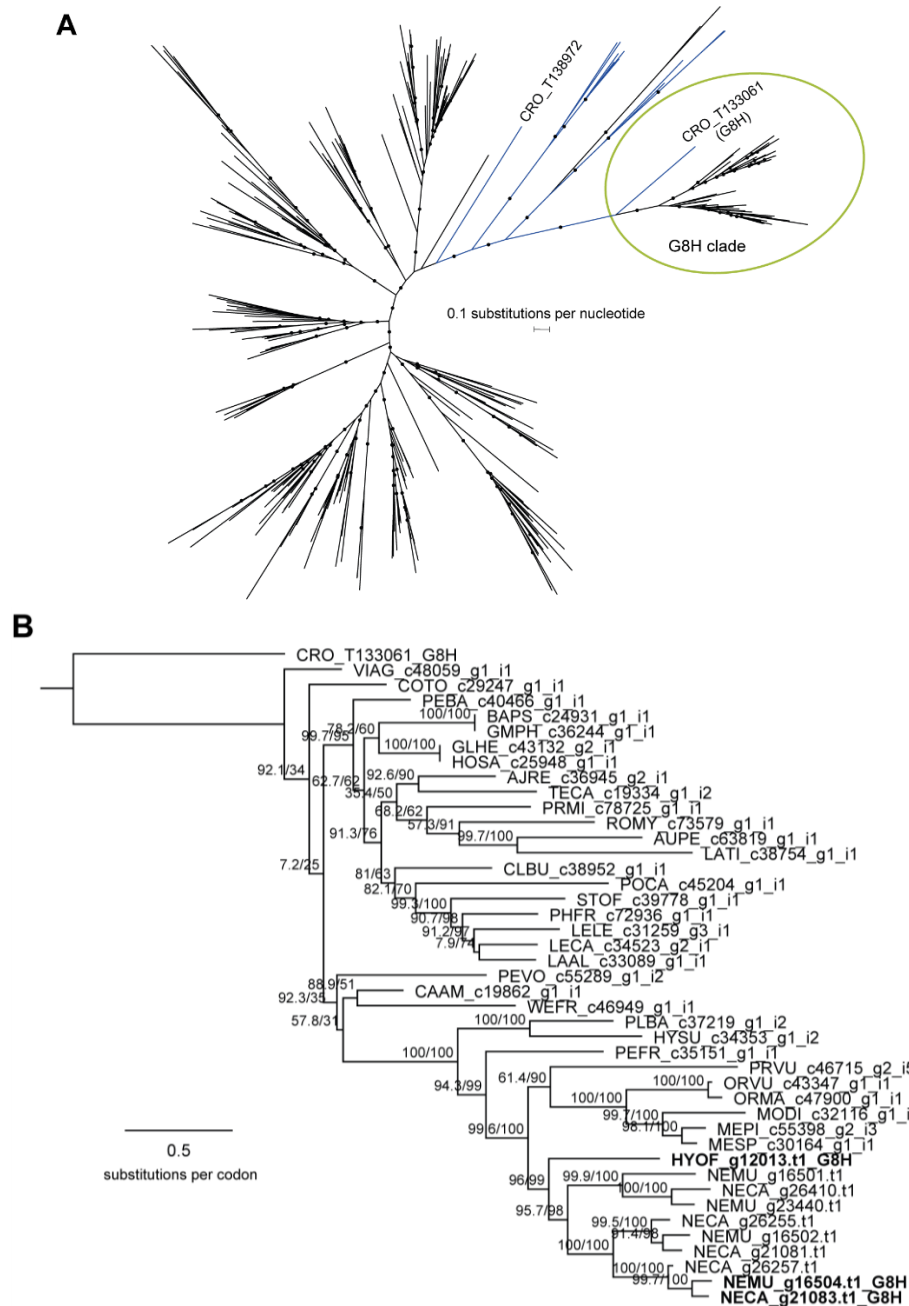

**Fig. S9. Geraniol 8-hydroxylase (*G8H*) phylogeny.** (A) Phylogeny of *G8H* (CYP76B6) orthogroup (OG0000115). Branches in blue represent sequences that are not in the Lamiales (the order containing Lamiaceae). Based on *Arabidopsis* genes, this family contains CYP76B and CYP76C sub-family sequences. Sequences orthologous to the functionally characterised *Catharanthus roseus G8H* (CRO\_T133061) form a distinctive clade. Tree inference performed with FastTree and represented using iTOL. Circles represent support values greater than 0.9. (B) Phylogeny of *G8H* clade. All sequences, except *C. roseus G8H*, are from Lamiaceae. Assayed sequences in bold. Tree inference performed with iQTree; support values are SH-aLRT support (%) / ultrafast bootstrap support (%). Species acronyms can be found in Table S5.

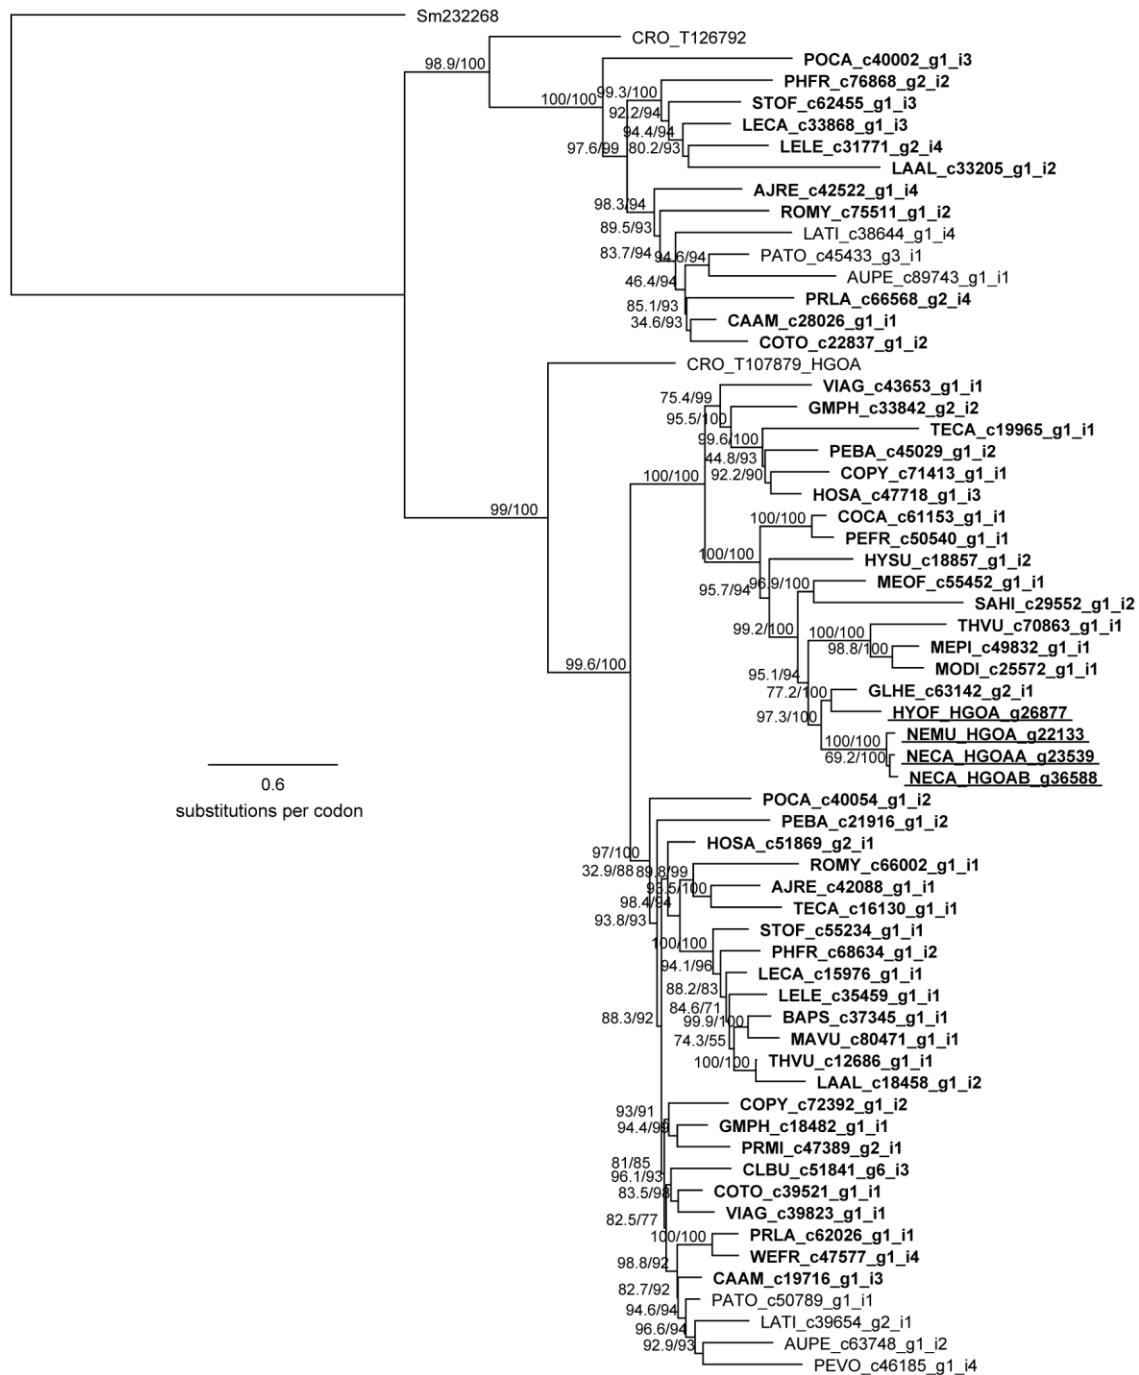

**Fig. S10. 8-Hydroxygeraniol oxidoreductase A (*HGOA*) phylogeny.** Lamiaceae sequences in bold; assayed sequences underlined. Sequences obtained by orthogroup analysis (OG0003405) and supplemented with sequences from the genomes. *Catharanthus roseus* *HGOA* has previously been functionally characterised. Tree inference with iQTree. Support values are SH-aLRT support (%) / ultrafast bootstrap support (%). Outgroups is a sequence from *Selaginella moellendorffii*. Active *HGOA* genes in *Nepeta* are orthologous to the *C. roseus* gene (CRO\_T107879). Species acronyms can be found in Table S5.

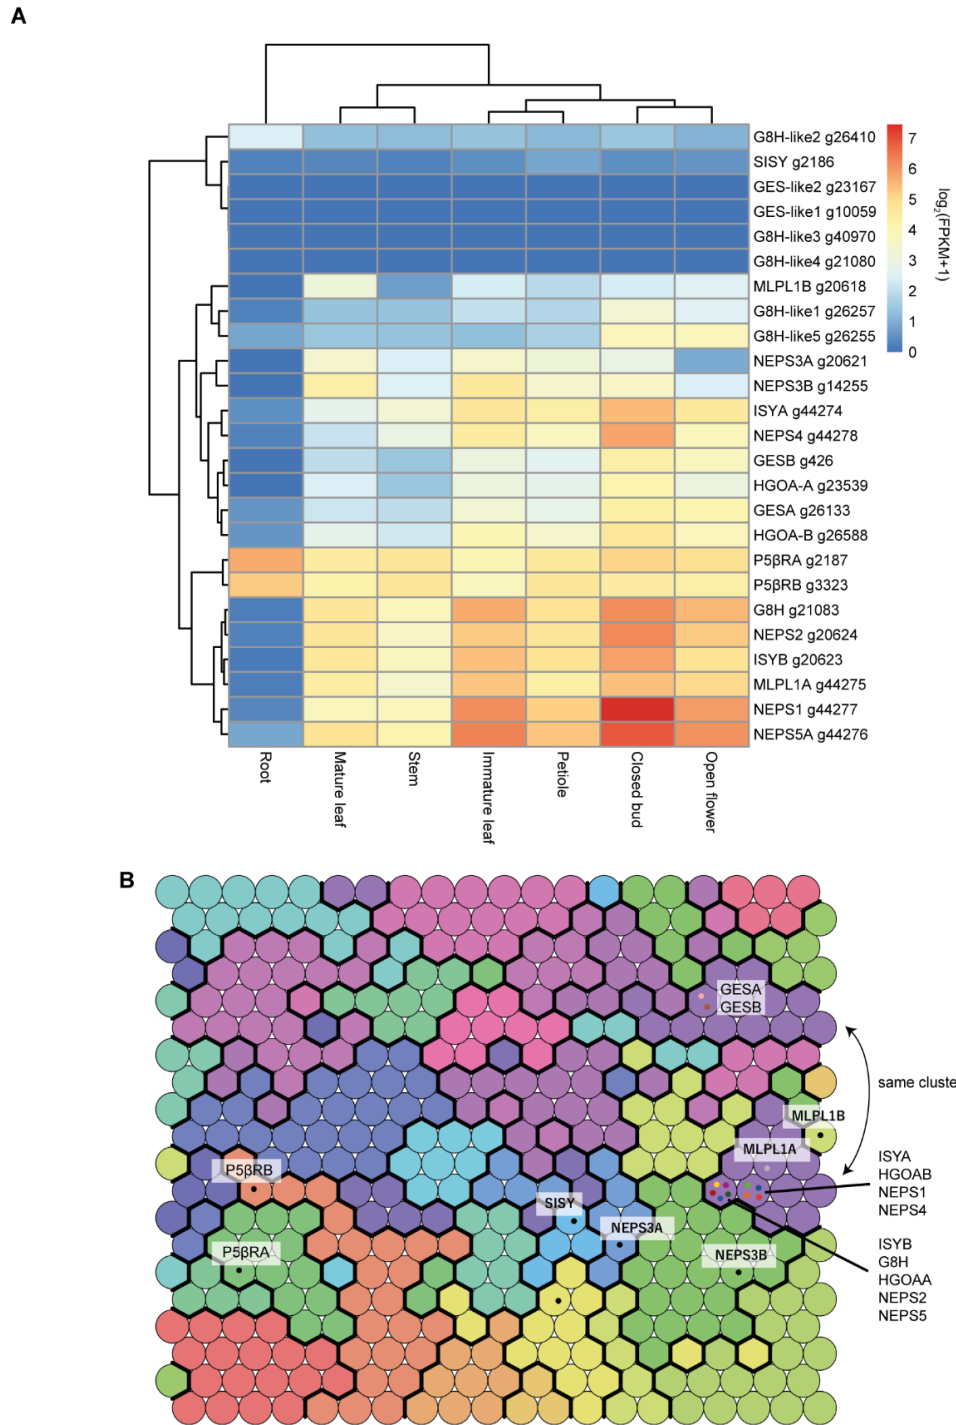

**Fig. S11. Expression of iridoid related genes in *N. cataria*.** (A) Tissue specific gene expression patterns of selected iridoid related genes and homologs, hierarchically clustered. (B) Self-organizing map of entire tissue atlas gene expression with iridoid related genes highlighted. Each circle contains a group of genes with very similar expression patterns; these circles are organised into clusters (separated by black lines) with somewhat similar expression patterns. Most of the selected biosynthetic genes are enriched within the same cluster ( $p < 1.8 \times 10^{-9}$ ).

A

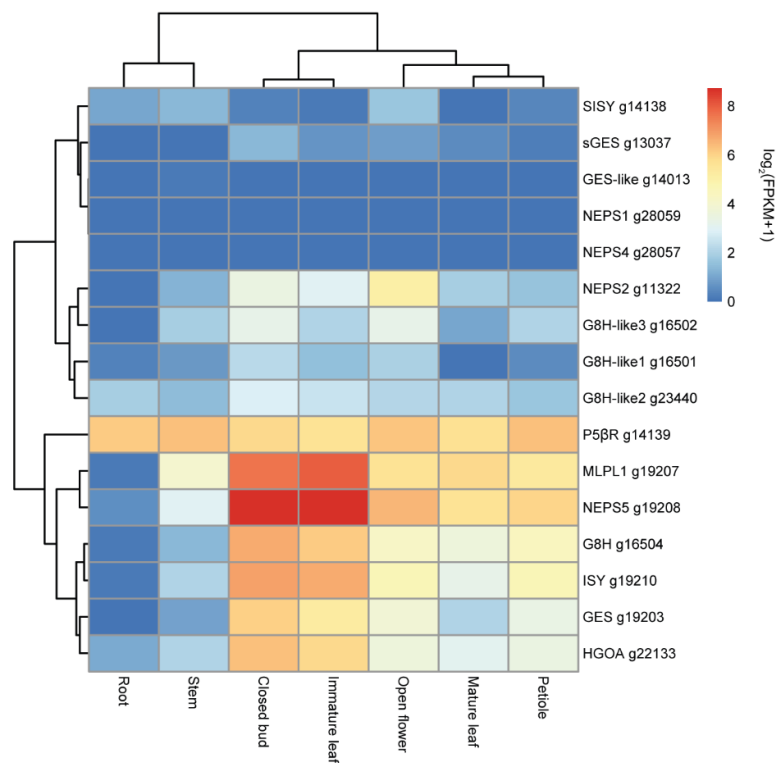

B

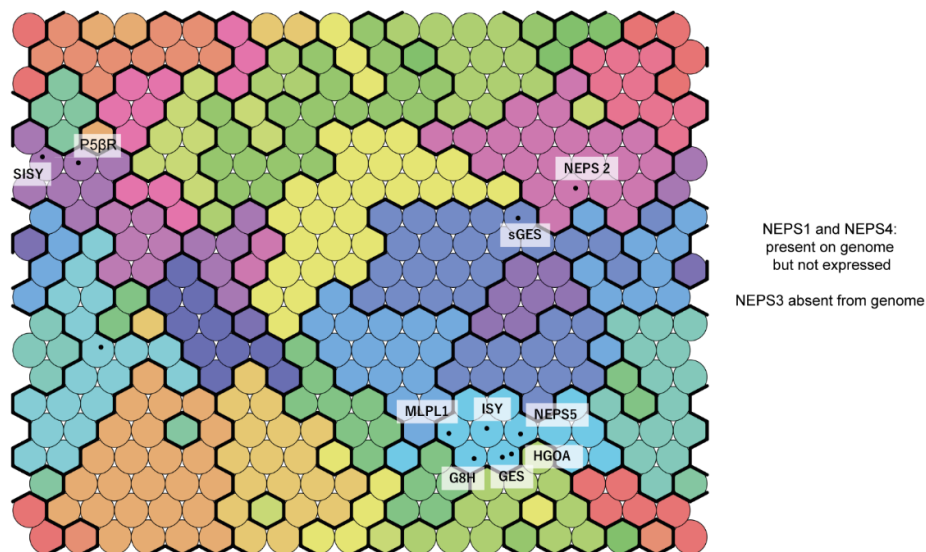

**Fig. S12. Expression of iridoid related genes in *N. mussinii*.** (A) Tissue specific gene expression patterns of selected iridoid related genes and homologs, hierarchically clustered (B) Self-organizing map of entire tissue atlas gene expression with iridoid related genes highlighted. Each circle contains a group of genes with very similar expression patterns; these circles are organised into clusters (separated by black lines) with somewhat similar expression patterns. Most of the selected biosynthetic genes are enriched within the same cluster ( $p < 3.5 \times 10^{-7}$ ).

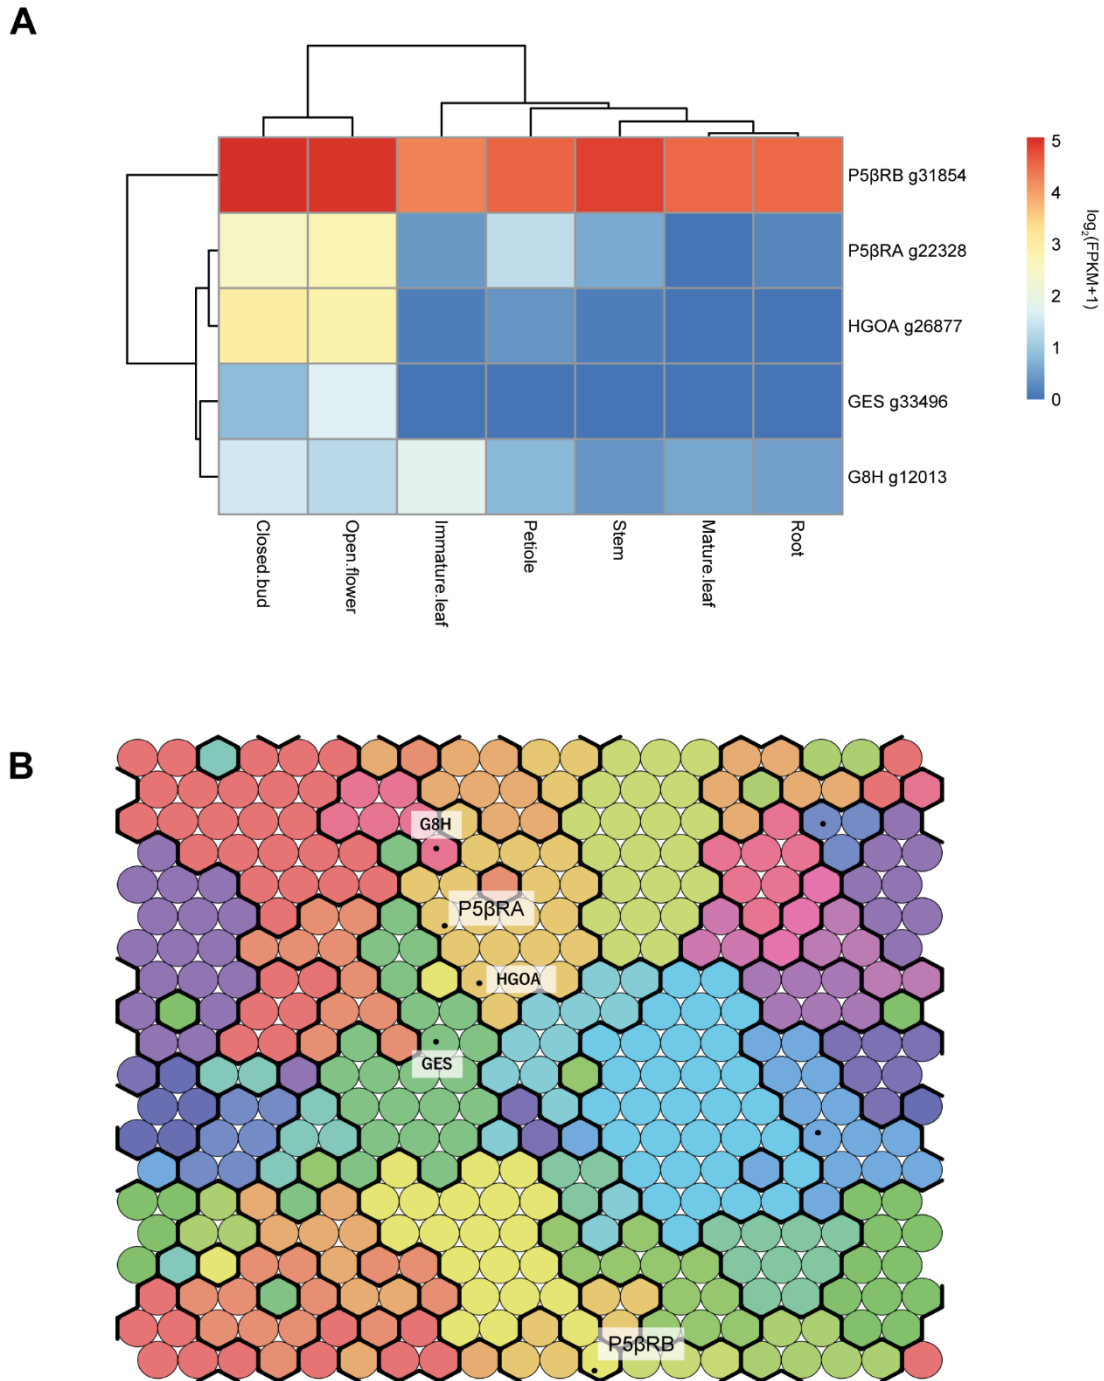

**Fig. S13. Expression of iridoid related genes in *H. officinalis*.** (A) Tissue specific gene expression patterns of selected *GES*, *G8H*, *HGOA* and *PRISE* homologs, hierarchically clustered. (B) Self-organizing map of entire tissue atlas gene expression with iridoid related genes highlighted. Each circle contains a group of genes with very similar expression patterns; these circles are organised into clusters (separated by black lines) with somewhat similar expression patterns. None of the selected genes are significantly enriched in a cluster ( $p > 0.13$ ).

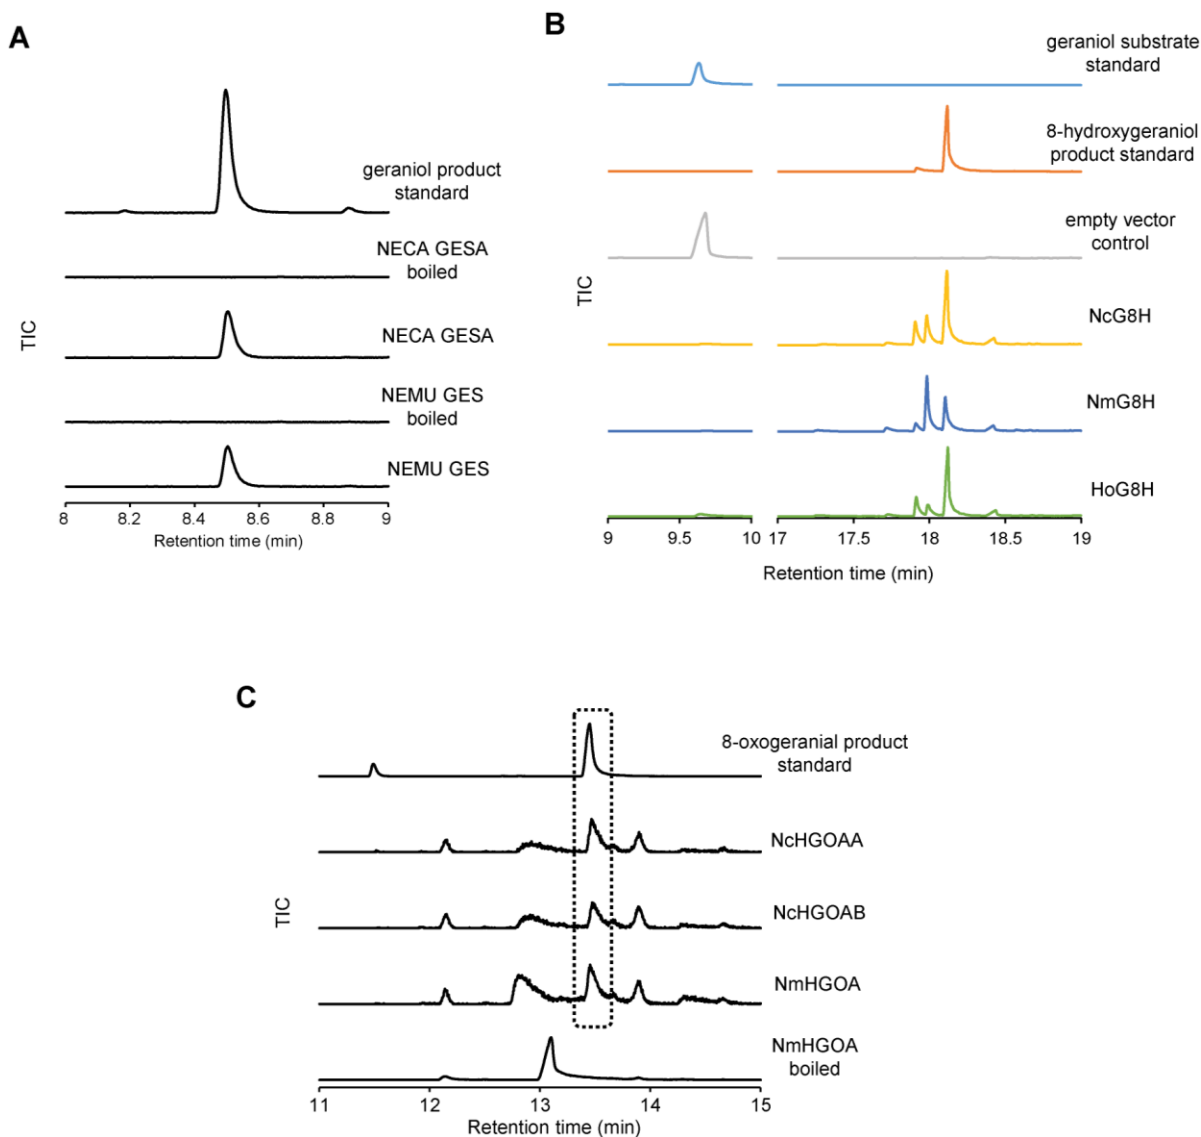

**Fig. S14. *In vitro* activity of early iridoid enzymes.** Analysis conducted by GC-MS analysis, with the total ion chromatograms (TICs) depicted. Sample intensity of standards and controls have been adjusted for presentation. **(A)** *In vitro* activity of GES candidates. GES from hyssop could not be expressed/purified, so its activity is unknown. **(B)** *In vitro* activity of G8H candidates. Extra product peaks are likely to be over-oxidized products (i.e. aldehydes). **(C)** *In vitro* activity of HGOA candidates. The HGOA reaction involves two  $\text{NAD}^+$ -controlled oxidation steps. Along with the double oxidised product, there are also two intermediates with single oxidations (8-hydroxygeraniol and 8-oxogeraniol) formed in this reaction. Without a downstream step in the reactions, these compounds exist at equilibrium and multiple peaks are observed. HGO from hyssop could not be expressed/purified, so its activity is unknown.

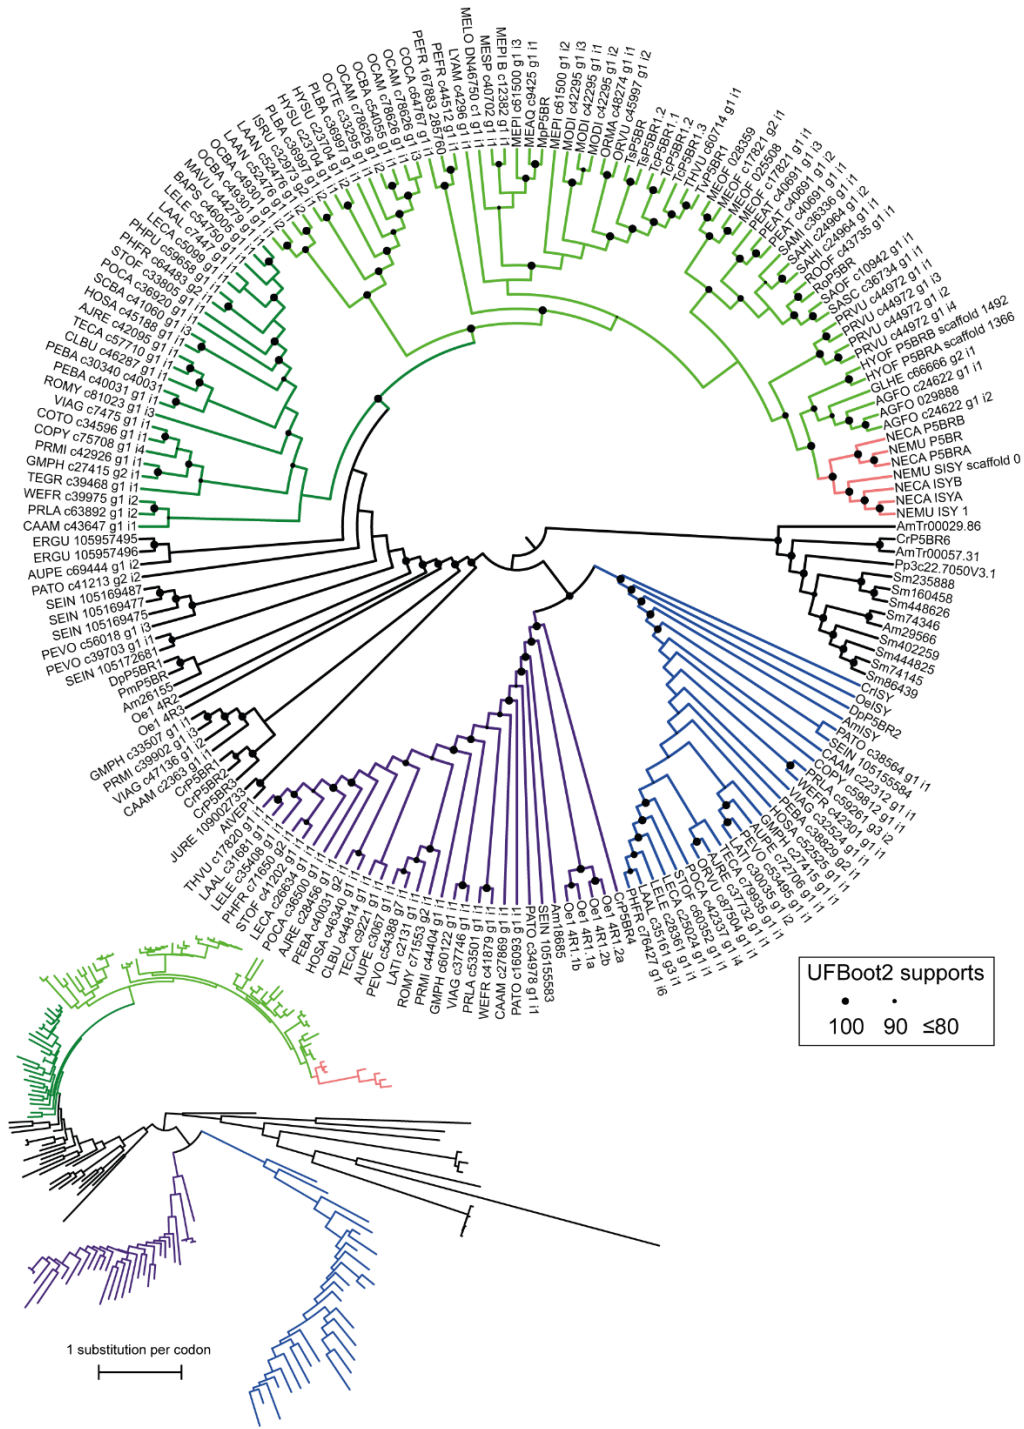

**Fig. S15. Phylogeny of the *PRISE* enzyme family.** Main cladogram with gene names. Blue branches show the *ISY*-clade; purple the *ISY-paralog* clade; dark green *P5βR* sequences from non-nepetoideae Lamiaceae; light green *P5βR* sequences from nepetoideae; red are sequences from *Nepeta*; all other branches are black. Ultra-fast bootstrap 2 values of range from 80 to 100 are depicted on nodes proportional to black circle size. Inset shows phylogram with branch lengths. Species acronyms can be found in Table S5.



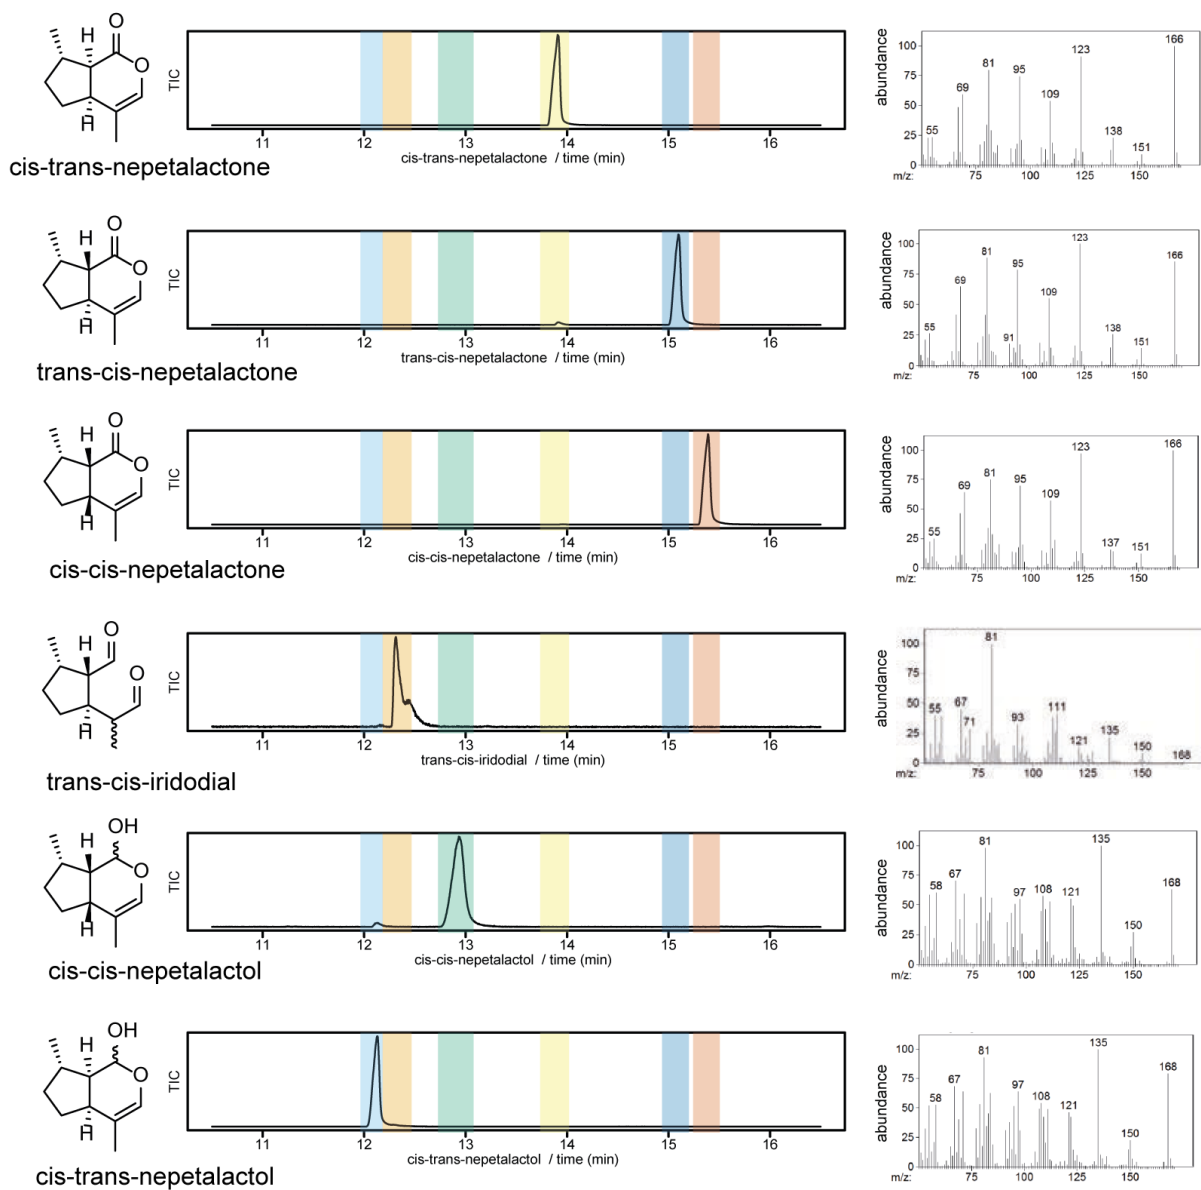

**Fig. S16. Product standards for GC-MS assays.** Total ion chromatograms (TICs) depicted, with corresponding electron impact (EI) spectra. Colored bars highlight retention times of product standards for assays presented in figs. S17-20. All enzyme product identities were also verified through manual assessment of EI-MS spectra compared to product standards.

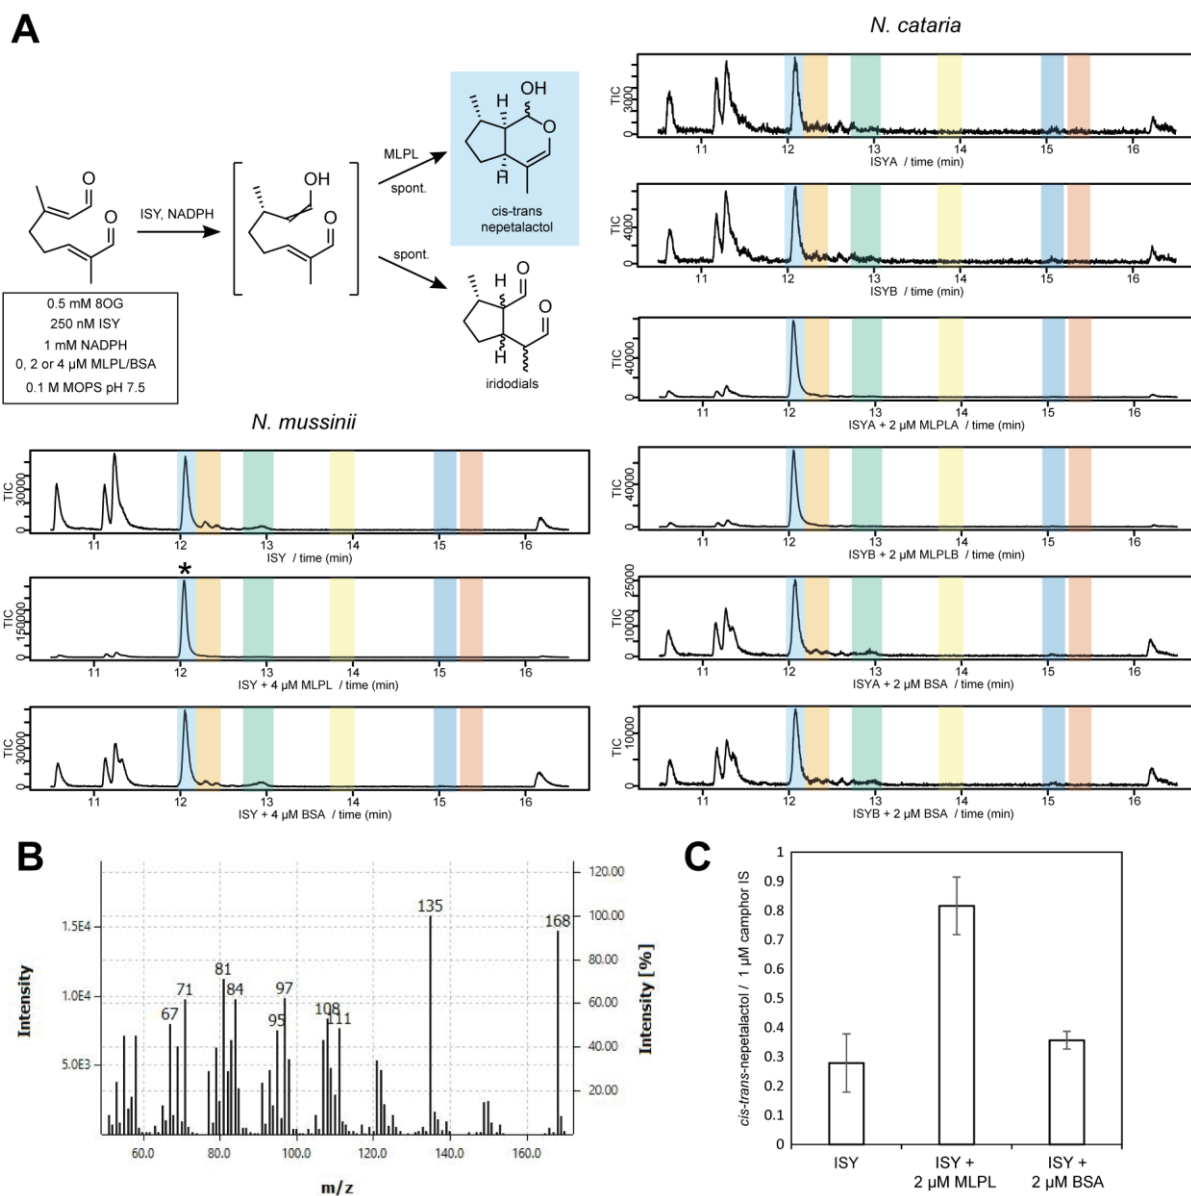

**Fig. S17. Cyclisation activity of MLPL.** (A) Coupled assays with 8-oxogeranial, ISY and MLPL from *Nepeta mussinii* and *N. cataria*. MLPL catalyzes the formation of cis-trans-nepetalactol. Bovine-serum-albumin (BSA) used as a control for MLPL activity. Standards can be found in fig. S16. Assays were performed independently three times with similar outcomes. Total ion chromatograms (TICs) depicted. (B) Electron impact (EI) spectrum for *cis-trans*-nepetalactol product from *N. mussinii* ISY + MLPL (4  $\mu$ M) (starred peak). (C) Cis-trans-nepetalactol peak area / camphor internal standard (IS) for *N. mussinii* MLPL (2  $\mu$ M) reactions. Error bars represent standard errors of three reactions. The ISY+ MLPL peak is significantly larger than ISY alone (t-test,  $p=0.02$ ) and ISY + BSA (t-test,  $p=0.01$ ) but ISY peak is not significantly different to ISY + BSA.

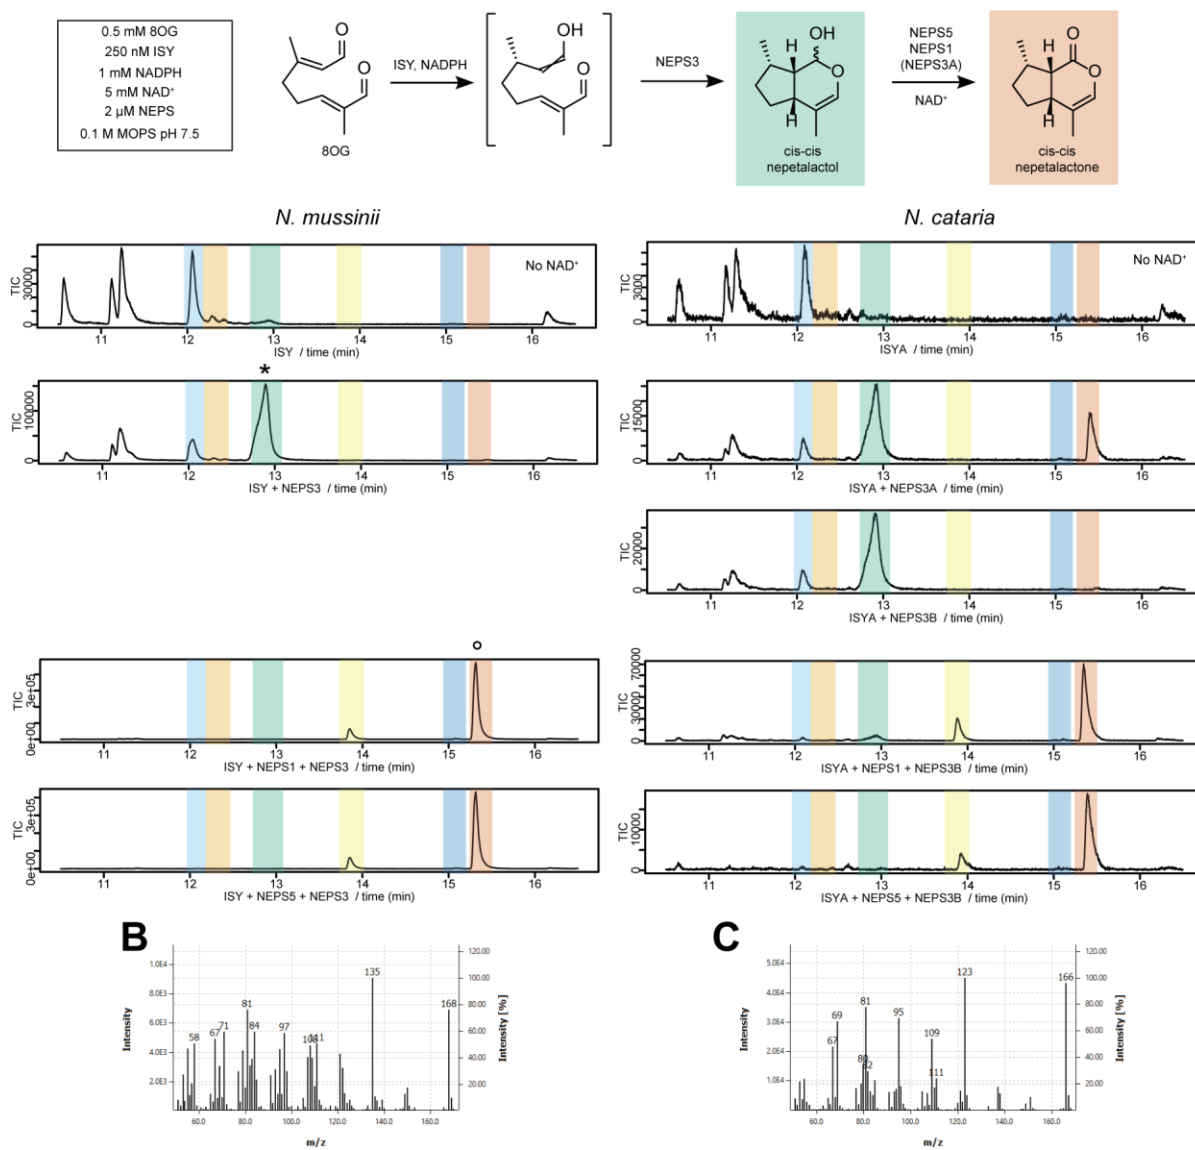

**Fig. S18. Enzymatic formation of cis-cis-nepetalactone.** (A) Coupled assays with 8-oxogeranial, ISY and NEPS from *Nepeta mussinii* and *N. cataria*. Standards can be found in fig. S16. Assays were performed independently three times with similar outcomes. Total ion chromatograms (TICs) depicted. (B) Electron impact (EI) spectrum for *cis-cis*-nepetalactol product from *N. mussinii* ISY + NEPS3 (4 μM) (starred peak). (C) EI spectrum for *cis-cis*-nepetalactone product from *N. mussinii* ISY + NEPS3 + NEPS1 (peak label °).

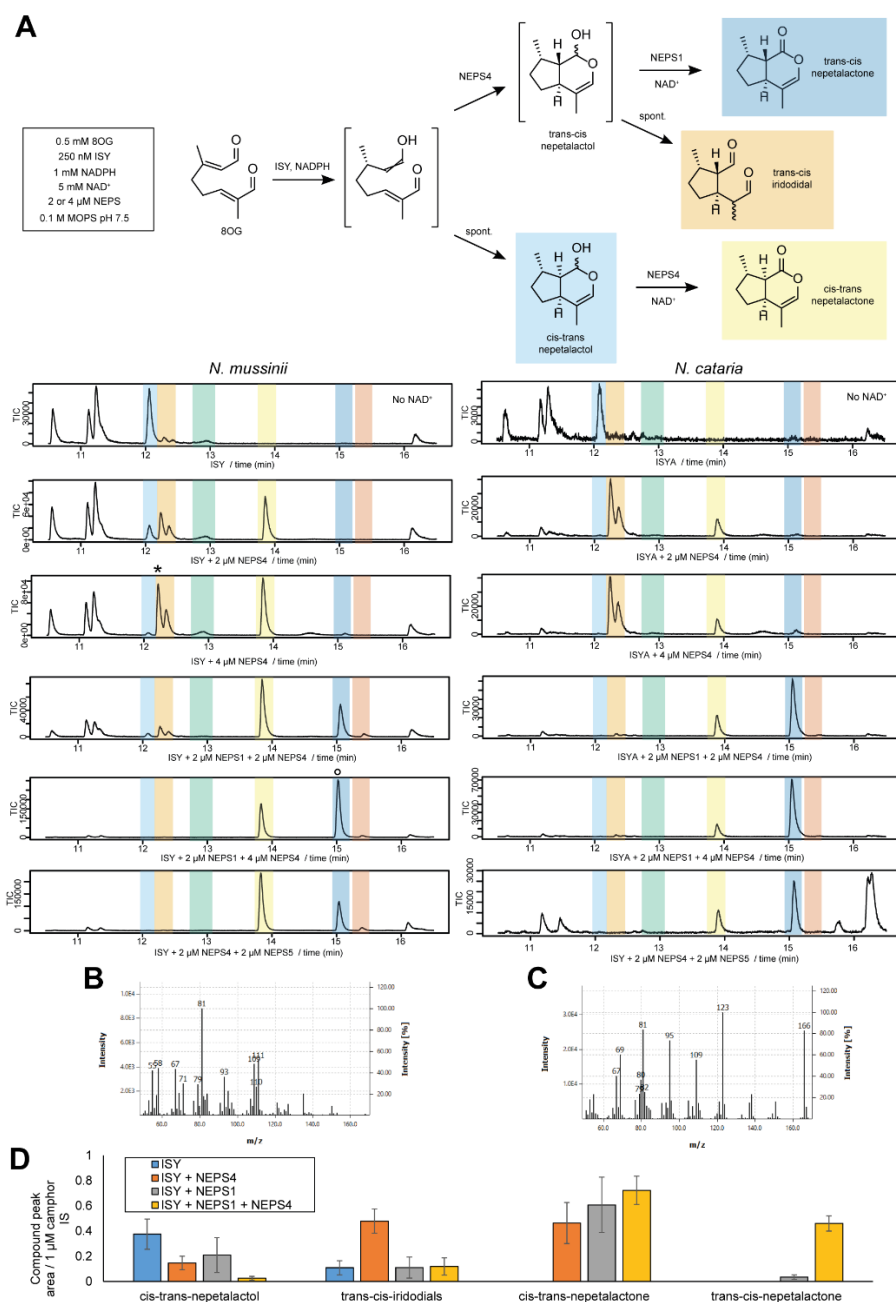

**Fig. S19. Enzymatic formation of trans-cis-nepetalactone.** (A) Coupled assays with 8-oxogeranial, ISY and NEPS from *Nepeta mussinii* and *N. cataria*. Standards can be found in fig. S16. Assays were performed independently three times with similar outcomes. (B) Electron impact (EI) spectrum for *trans-cis-iridodial* product from *N. mussinii* ISY + NEPS4 (4 μM) (starred peak). (C) EI spectrum for *trans-cis-nepetalactone* product from *N. mussinii* ISY + NEPS4 (4 μM) + NEPS1 (peak label °). (D) Compound peak areas relative to an internal standard for *N. mussinii* enzyme assays. Data points are means of 4 independent measurements and show standard errors.

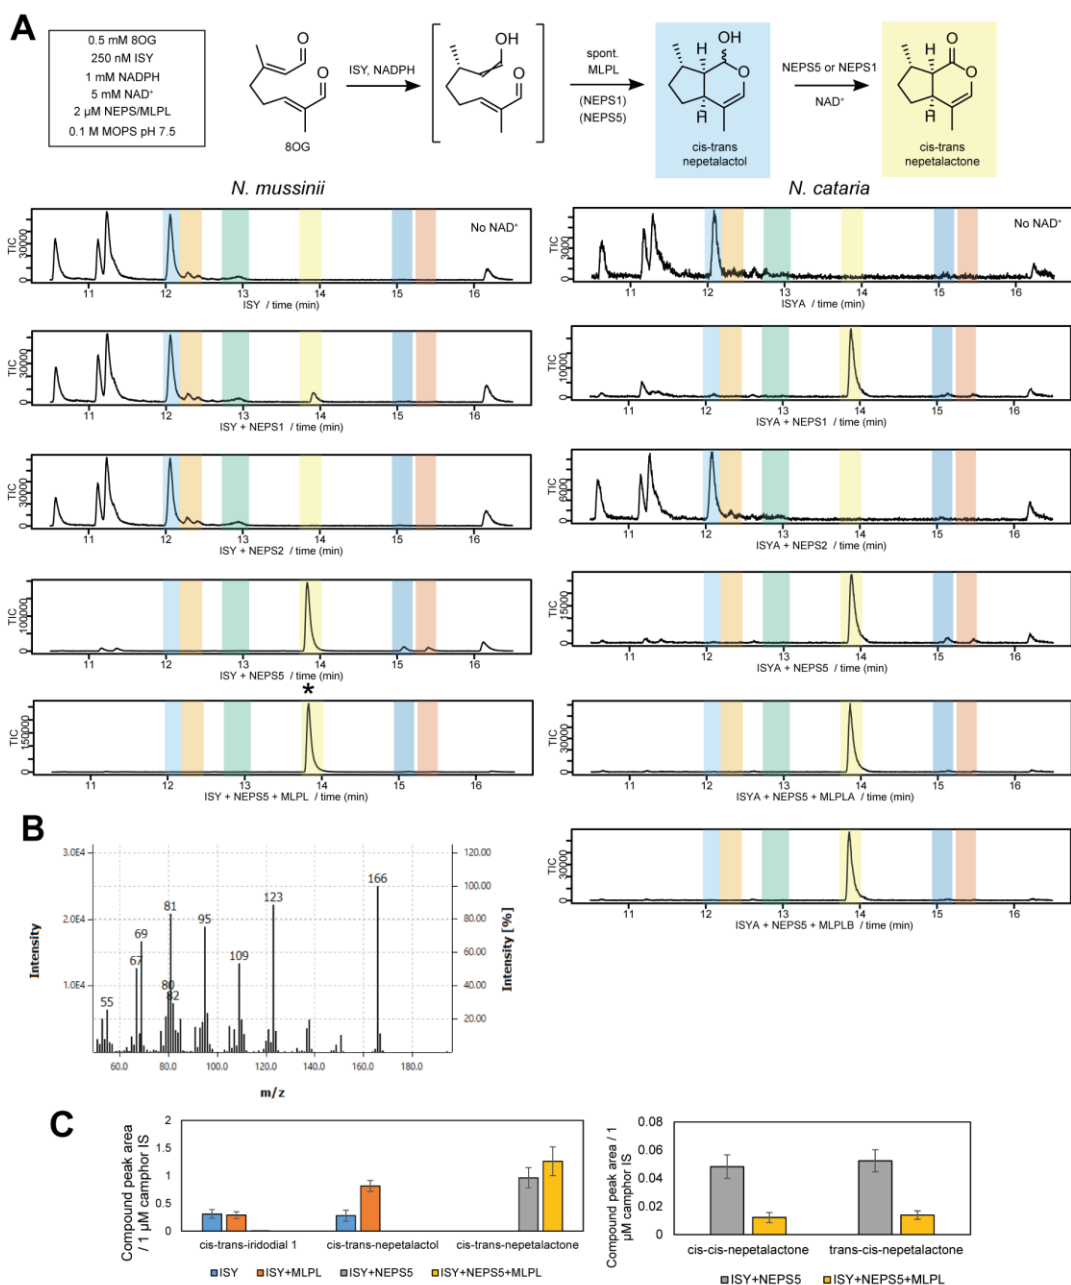

**Fig. S20. Enzymatic formation of cis-trans-nepetalactone.** (A) Coupled assays with 8-oxogeranial, ISY and NEPS from *Nepeta mussinii* and *N. cataria*. Standards can be found in fig. S16. Assays were performed independently three times with similar outcomes. Total ion chromatograms (TICs) depicted. (B) Electron impact (EI) spectrum for *cis-trans-nepetalactone* product from *N. mussinii* ISY + MLPL + NEPS5 (starred peak). (C) Compound peak areas relative to an internal standard for *N. mussinii* enzyme assays. Data points are means of three independent measurements and show standard errors. For ISY+NEPS5 reactions, addition of MLPL slightly increases *cis-trans-nepetalactone*, and

reduces other nepetalactone isomers, indicating it promotes cis-trans-nepetalactone at the expense of other isomers.

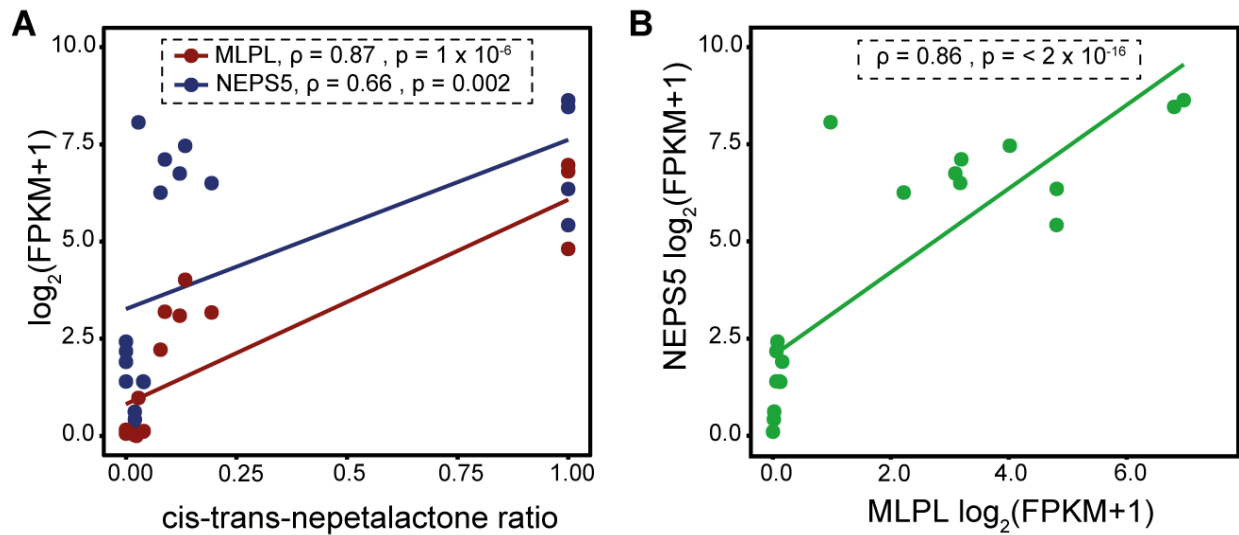

**Fig. S21 *NEPS5*, *MLPL* and cis-trans-nepetalactone correlation in *N. mussinii*.** (A) Expression of *NEPS5* and *MLPL* genes compared to cis-trans-nepetalactone ratios in plant. Straight lines are linear models. Spearman's rank correlation results are inset. *MLPL* and *NEPS5* expression levels are positively correlated with cis-trans-nepetalactone ratios, though the correlation is greater and more significant for *MLPL*. (B) Correlation between *NEPS5* and *MLPL* gene expression. Straight line is linear model. Spearman's rank correlation result is inset: the expression of the two genes are very significantly positively correlated. Overall this figure indicates that *MLPL*, *NEPS5* and cis-trans-nepetalactone accumulation are significantly correlated.

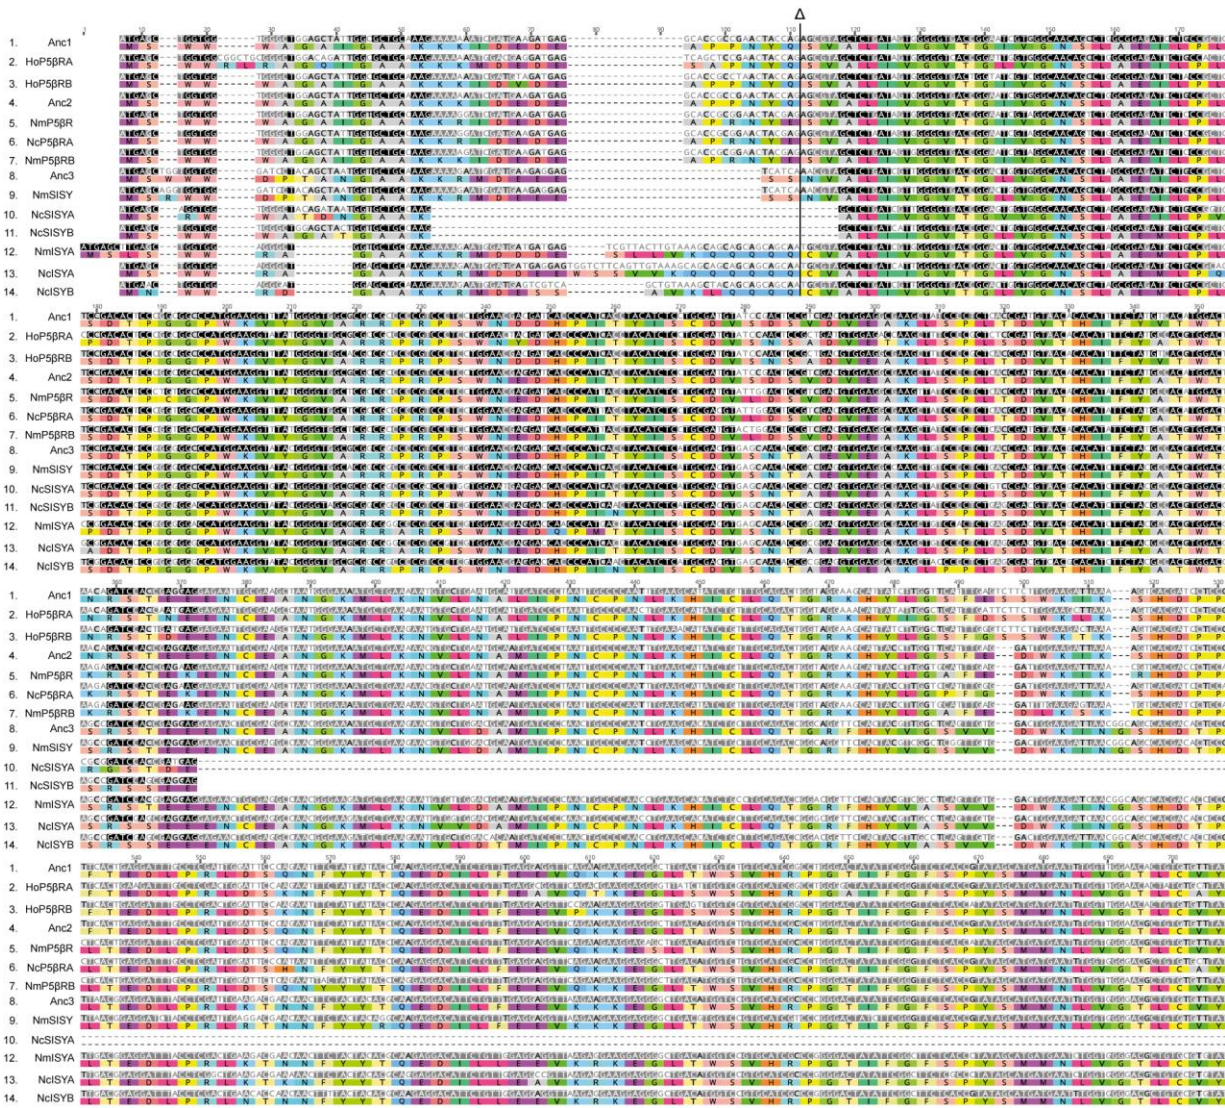

**Fig. S22.** Sequence alignment of *PRISE* genes from *Nepeta* and hyssop. Continued on next page.



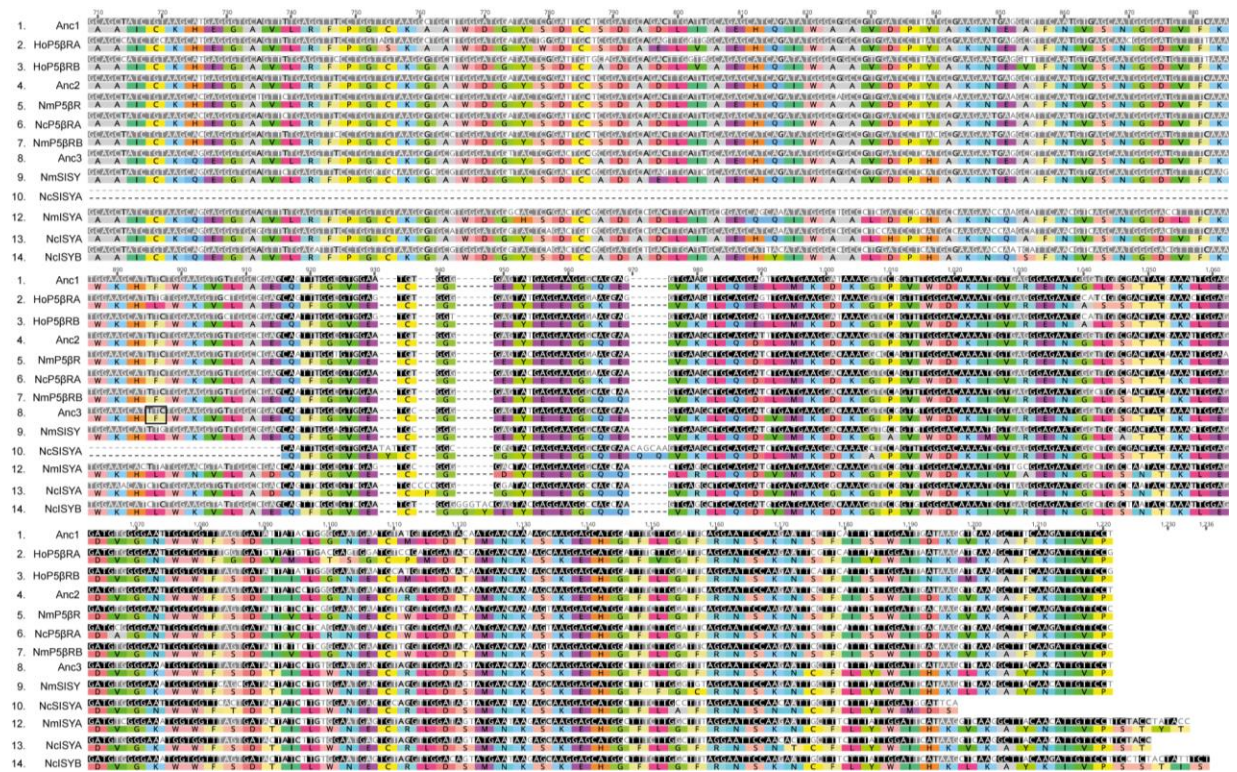

**Fig. S22. Sequence alignment of *PRISE* genes from *Nepeta* and hyssop.** Codon alignment of *PRISE* genes from *Nepeta* and hyssop. The delta ( $\Delta$ ) represents the N-terminal truncation for recombinant proteins. The *NcSISY* pseudogenes were absent from phylogenetic analyses as they destabilized the tree topology. With the exception of the ancestral genes, and *SISYs* which could not be cloned, all sequences here are the cloned sequence verified genes used in assays. The phylogenies (figs. S15 and S23) were constructed with genomic sequences from hyssop. The boxed codon in Anc3 shows the location of the equivocal TTTG-TTC (see methods for details)

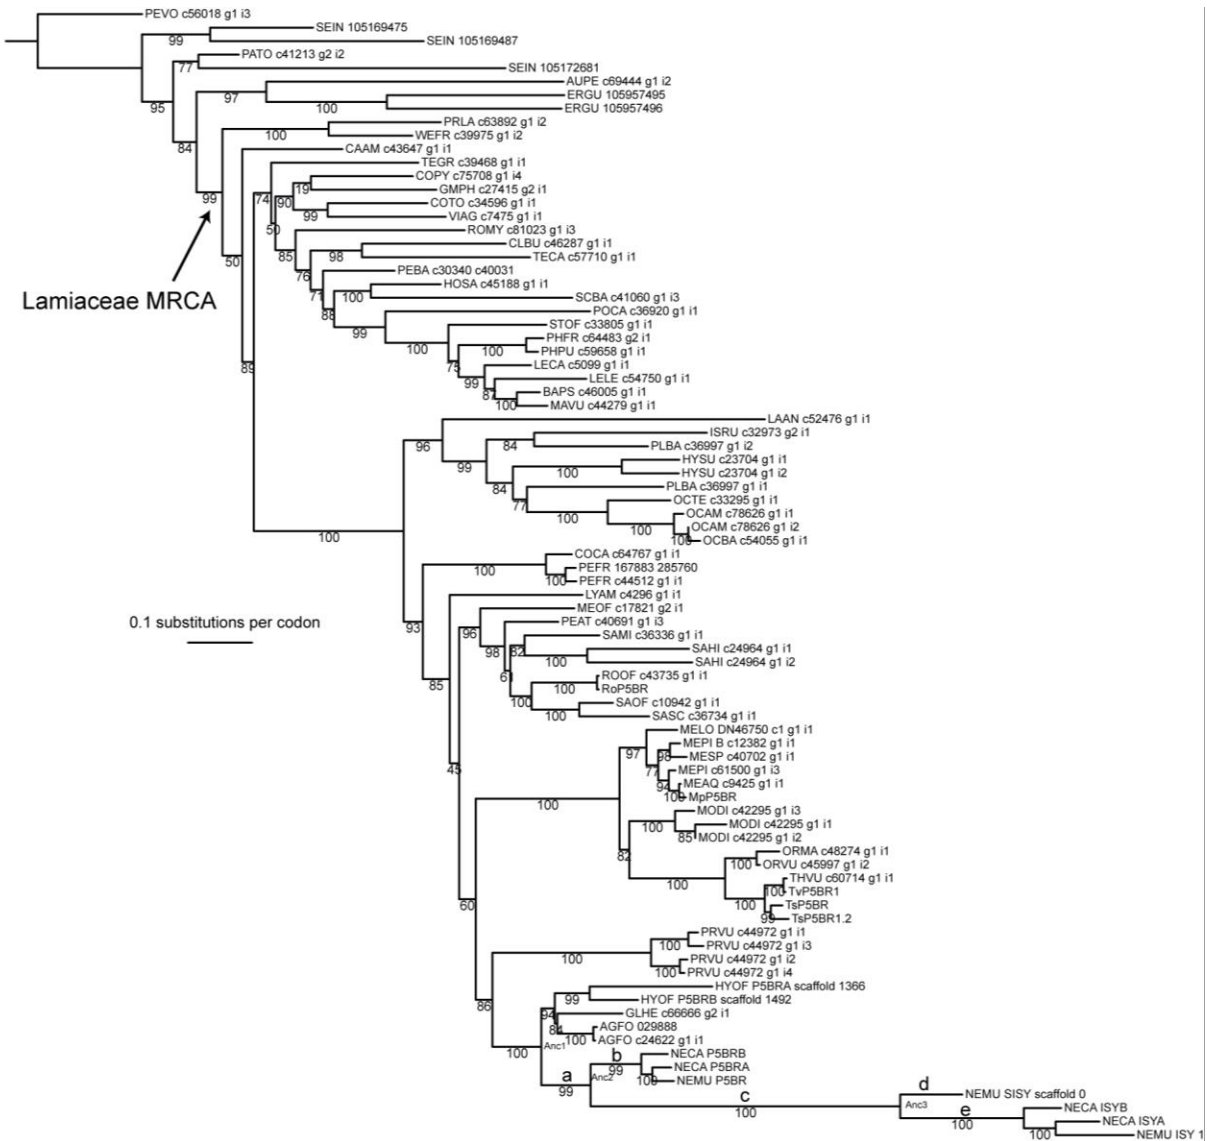

**Fig. S23. Phylogeny of sub-sampled *PRISE* enzyme family.** Tree phylogeny recalculated to focus on *P5βR* clade in Lamiaceae, with the Lamiaceae most recent common ancestor (MRCA) node labelled. Support values (UFBoot2) are labelled. This tree was used for positive selection analysis and ancestral reconstruction analysis. Branches tested for positive selection are labelled; nodes reconstructed are labelled. Species acronyms can be found in Table S5.

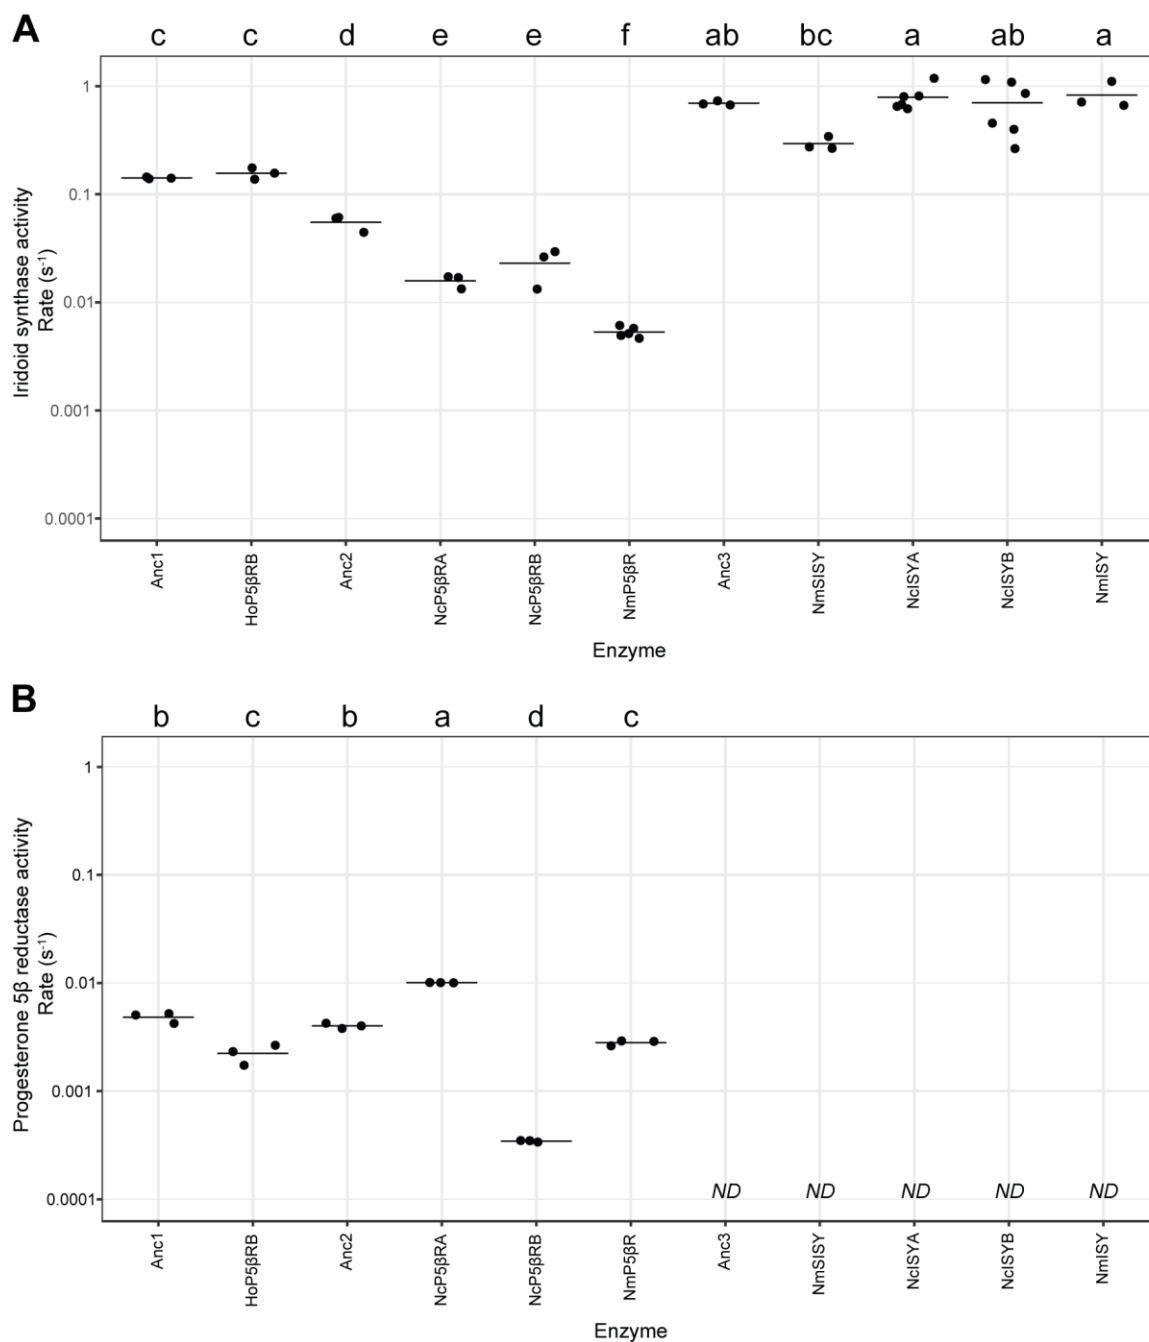

**Fig. S24. Activities of PRISE enzymes from *Nepeta* and hyssop.** In vitro enzyme activities of extant PRISEs from hyssop and *Nepeta* and reconstructed ancestral enzymes. Note logarithmic scale. Letters above plots represent groups of means with statistically significant ( $p < 0.05$ ) differences, as determined by analysis of variation and Tukey's post-hoc test. **(A)** ISY activity: reduction of 8-oxogeranial, measured spectrophotometrically by tracking depletion of NADPH (change in absorbance at 340 nm). **(B)** Progesterone 5 $\beta$ -reductase activity: reduction of progesterone, measured using a GC-MS timecourse.

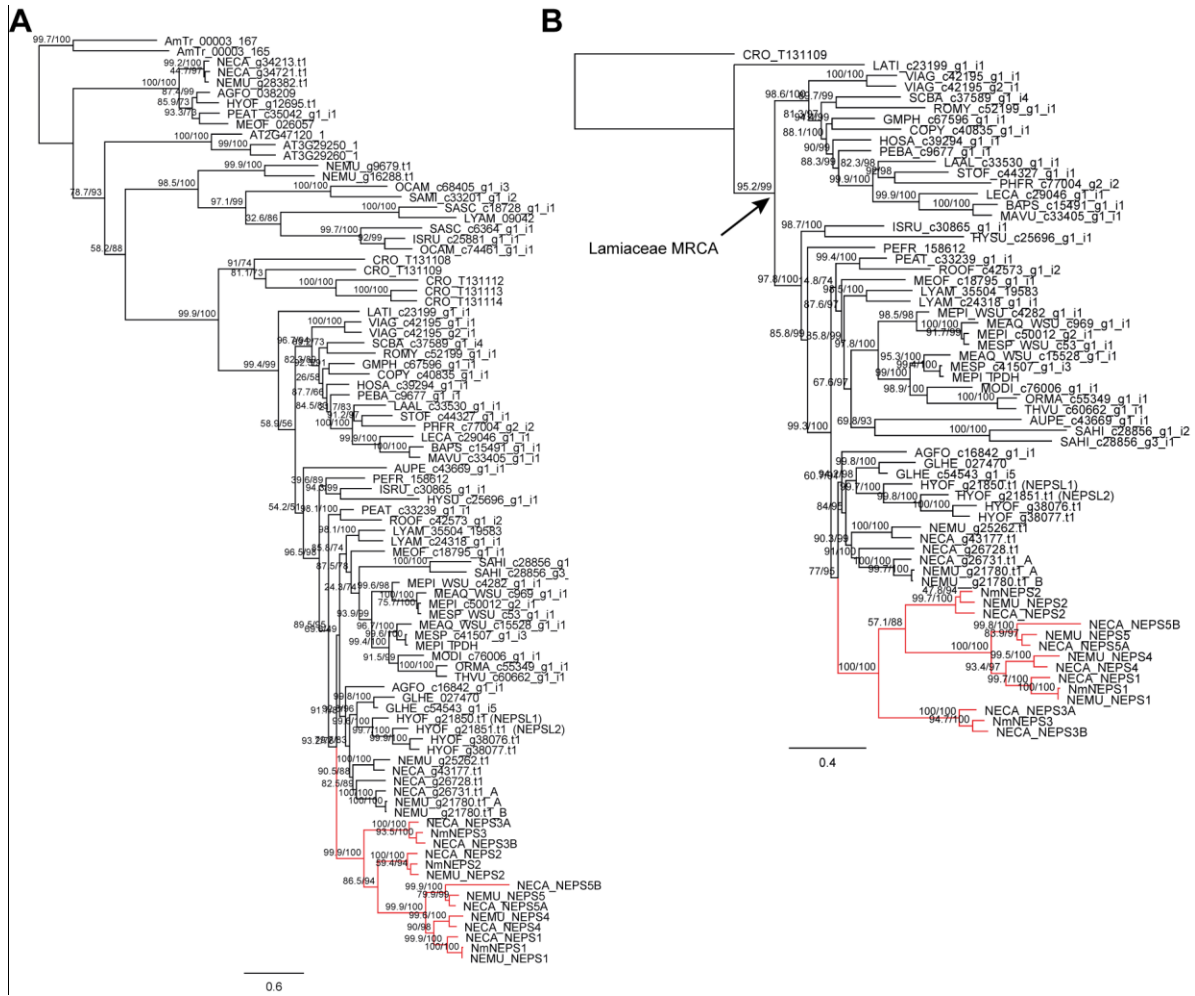

**Fig. S25. NEPS phylogeny.**(A) Phylogram of whole *NEPS-like* OG0004576 orthogroup. (B) Phylogram of selected sequences from OG0004576 showing a single Lamiaceae clade, with Lamiaceae most recent common ancestor (MRCA) node labelled. The *NEPS* clade is highlighted in red. Species acronyms can be found in Table S5.

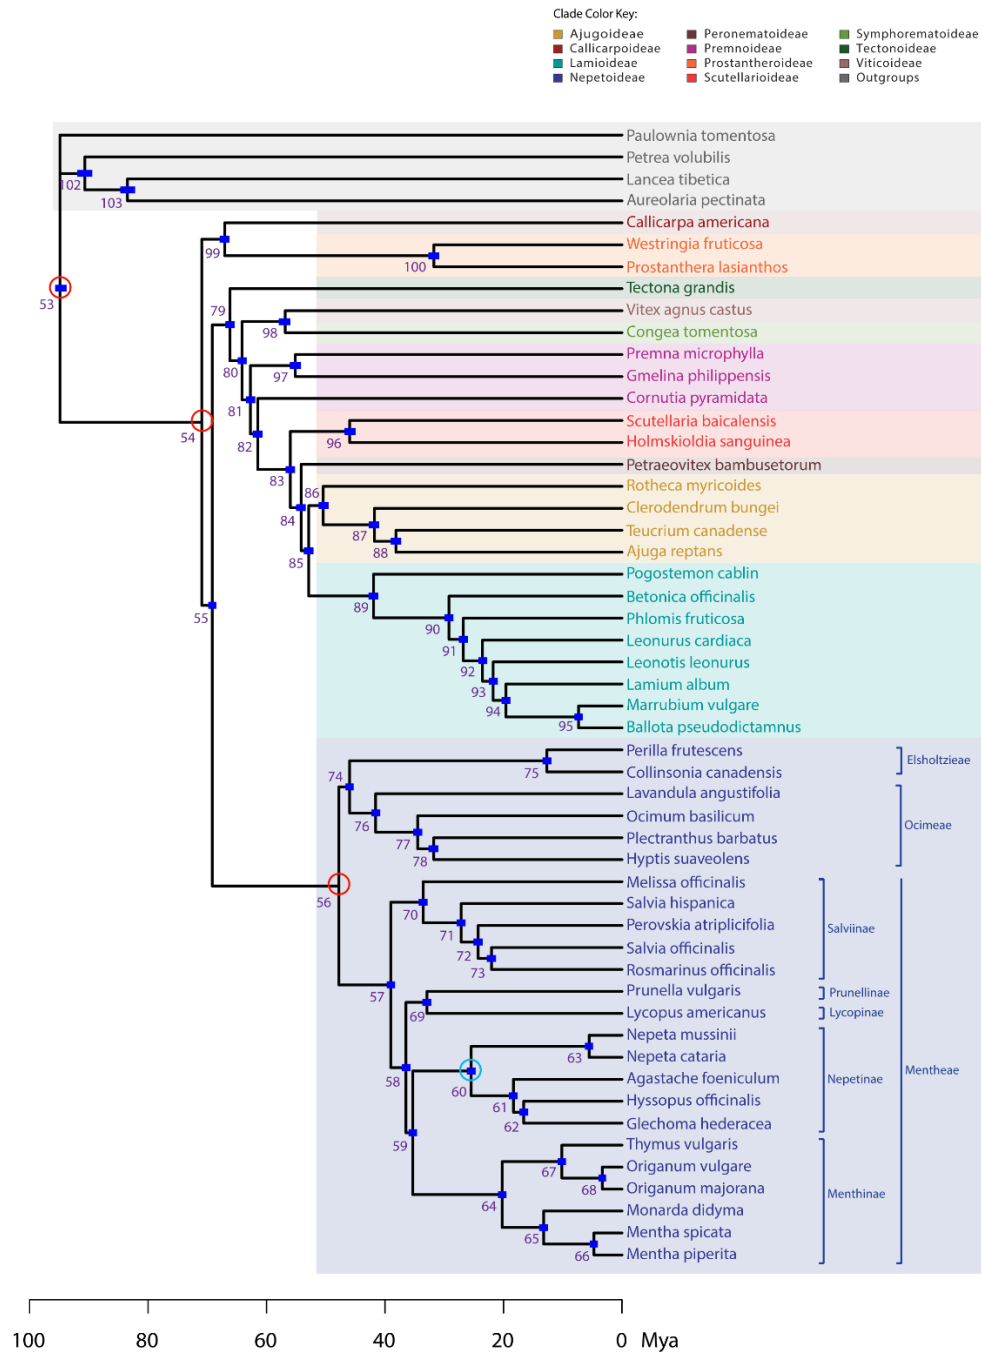

**Fig. S26. Species chronogram.** Divergence times (millions of years ago, Mya) were estimated assuming a relaxed molecular clock, as implemented in treePL with a penalized likelihood approach. Shown here is a summary of estimated ages from 100 dated bootstrap trees, with blue bars showing 95% confidence intervals. Open red circles denote nodes with age calibrations and an open blue circle indicates the confidence interval extracted for use as a secondary calibration in the PRISE and NEPS divergence times analyses. Subfamilial classifications for all species are color coded according to the key provided, and tribal and subtribal are indicated for Nepetoideae (75, 76).

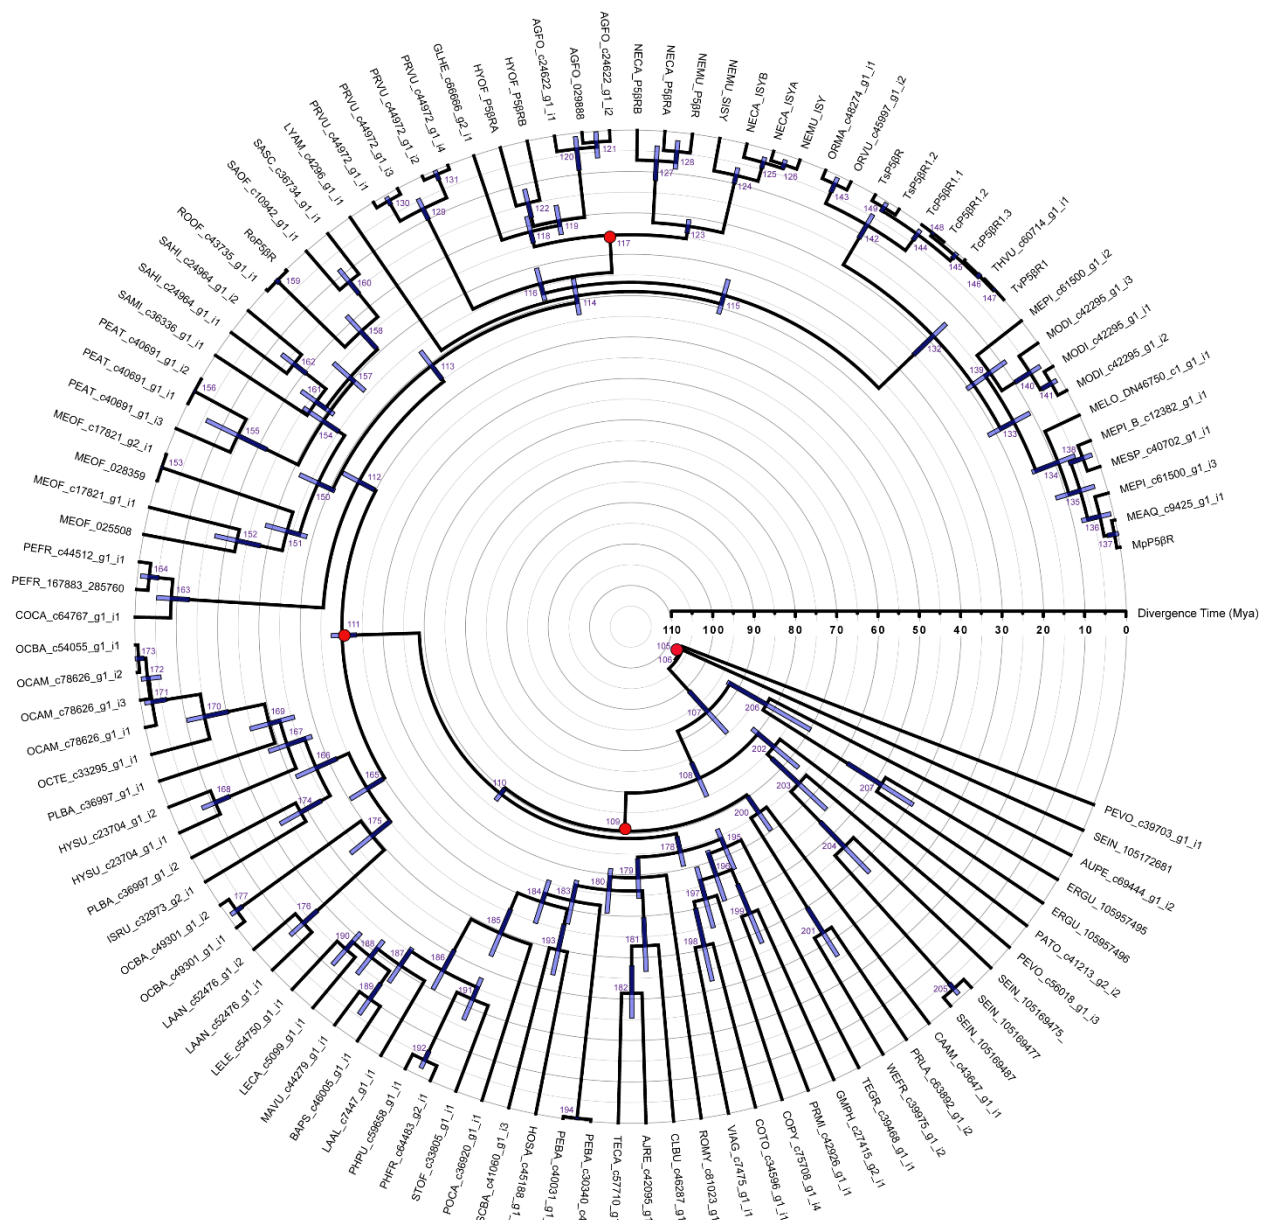

**Fig. S27. Chronogram of Progesterone 5 $\beta$ -reductase/iridoid synthase (*PRISE*) evolution.** Divergence times (millions of years ago, Mya) were estimated assuming a relaxed molecular clock, as implemented in treePL with a penalized likelihood approach. Shown here is a summary of estimated ages from 1000 dated bootstrap trees, with blue bars showing 95% confidence intervals. Red circles denote calibrated nodes. Species acronyms can be found in Table S5.

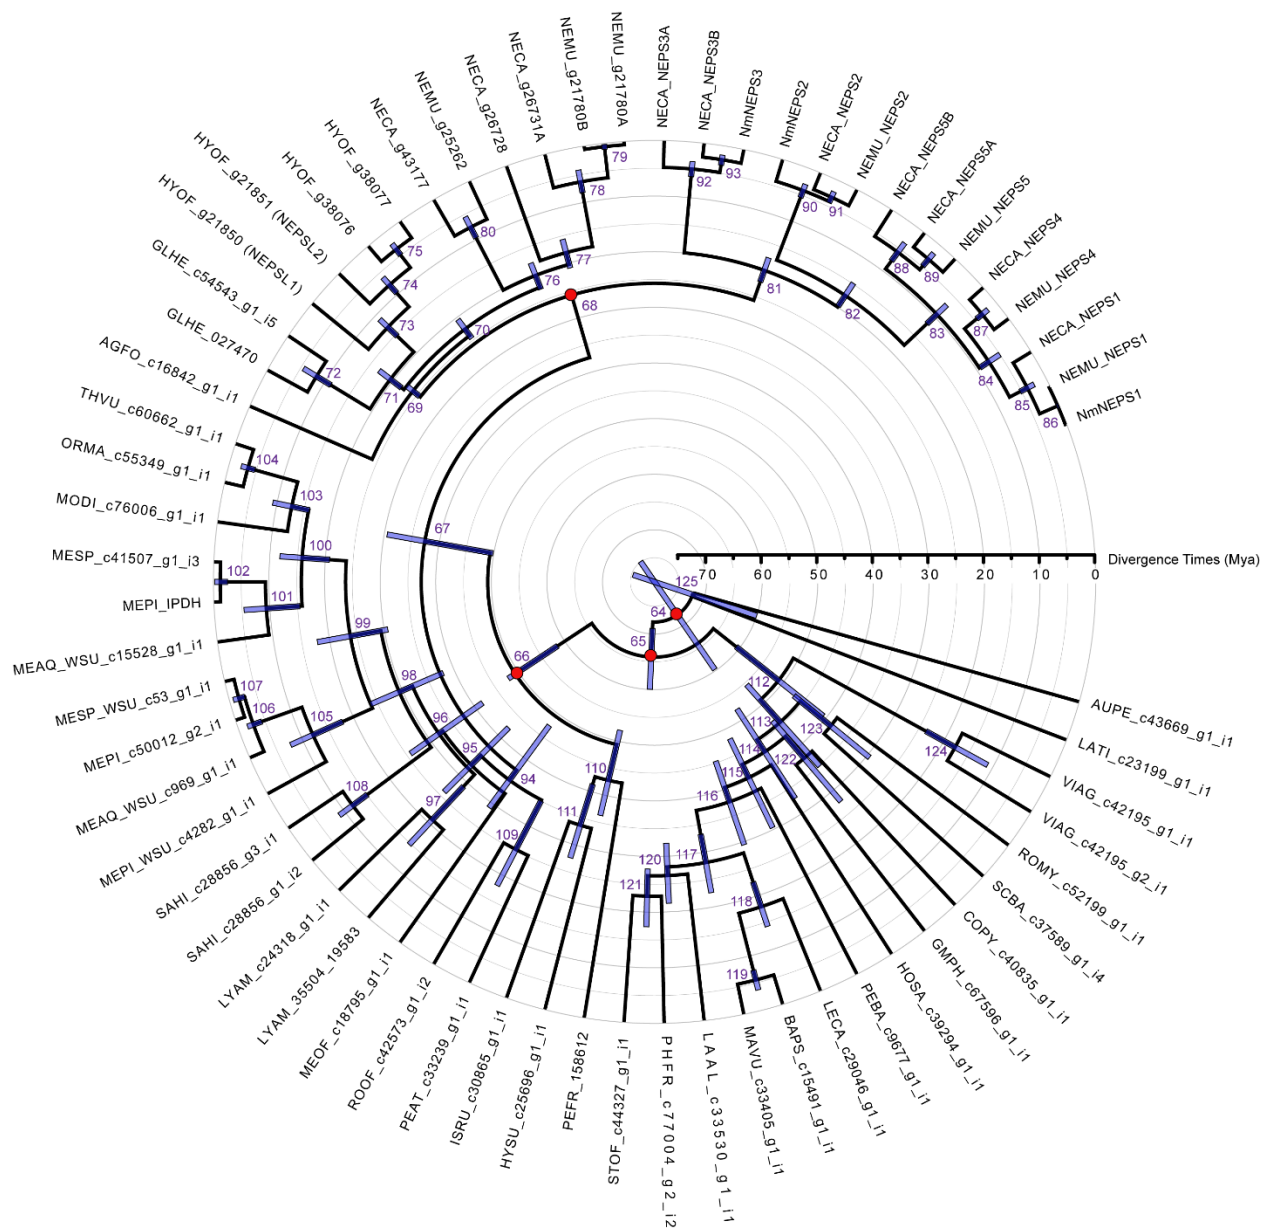

**Fig. S28. Chronogram of NEPS and NEPS-like evolution.** Divergence times (millions of years ago, Mya) were estimated assuming a relaxed molecular clock, as implemented in treePL with a penalized likelihood approach. Shown here is a summary of estimated ages from 1000 dated bootstrap trees, with blue bars showing 95% confidence intervals. Red circles denote calibrated nodes. Species acronyms can be found in Table S5.

**Table S1. Libraries used in assembly and annotation of *H. officinalis* and *N. cataria***

| Library ID                  | Library Type                        | Read Length (nt) | Type of Sequencing | Library Size (bp) | Total Reads | Bioproject  | Biosample    |
|-----------------------------|-------------------------------------|------------------|--------------------|-------------------|-------------|-------------|--------------|
| <i>Hyssopus officinalis</i> |                                     |                  |                    |                   |             |             |              |
| HYS_AA                      | Whole genome sequencing             | 150              | Paired end         | 362               | 92,937,185  | PRJNA529676 | SAMN11466421 |
| HYS_AF                      | Mate pair 2kb                       | 150              | Paired end         | 778               | 39,475,350  | PRJNA529676 | SAMN11466421 |
| HYS_AH                      | Mate pair 4kb                       | 150              | Paired end         | 594               | 50,761,467  | PRJNA529676 | SAMN11466421 |
| HYS_AI                      | Mate pair 6kb                       | 150              | Paired end         | 548               | 50,176,401  | PRJNA529676 | SAMN11466421 |
| HAY_AJ                      | Mate pair 10kb                      | 150              | Paired end         | 570               | 44,717,692  | PRJNA529676 | SAMN11466421 |
| HYS_AB_Run1                 | Pacific Biosciences Selection >20kb | -                | -                  | -                 | 3.4Gb       | PRJNA529676 | SAMN11467189 |
| HYS_AB_Run2                 | Pacific Biosciences Selection >15kb | -                | -                  | -                 | 6Gb         | PRJNA529676 | SAMN11467189 |
| MINT_FM                     | RNAseq: closed flower buds          | 150              | Paired end         | 252               | 40,282,518  | PRJNA529676 | SAMN11466428 |
| MINT_FH                     | RNAseq: immature leaf               | 150              | Paired end         | 259               | 42,372,404  | PRJNA529676 | SAMN11466423 |
| MINT_FG                     | RNAseq: mature leaf                 | 150              | Paired end         | 264               | 43,763,710  | PRJNA529676 | SAMN11466422 |
| MINT_FL                     | RNAseq: open flower buds            | 150              | Paired end         | 250               | 42,485,284  | PRJNA529676 | SAMN11466427 |
| MINT_FJ                     | RNAseq: petiole                     | 150              | Paired end         | 263               | 42,850,202  | PRJNA529676 | SAMN11466425 |
| MINT_FK                     | RNAseq: root                        | 150              | Paired end         | 254               | 52,057,979  | PRJNA529676 | SAMN11466426 |
| MINT_FI                     | RNAseq: stem                        | 150              | Paired end         | 257               | 44,804,481  | PRJNA529676 | SAMN11466424 |
| <i>Nepeta cataria</i>       |                                     |                  |                    |                   |             |             |              |
| MINT_EK                     | Whole genome sequencing             | 150              | Paired end         | 385               | 78,581,091  | PRJNA359989 | SAMN06200307 |
| MINT_EL                     | Whole genome sequencing             | 150              | Paired end         | 388               | 104,966,807 | PRJNA557218 | SAMN12391618 |
| MINT_EB                     | Mate pair 4kb                       | 150              | Paired end         | 607               | 39,971,767  | PRJNA557218 | SAMN12391618 |
| MINT_EC                     | Mate pair 7kb                       | 150              | Paired end         | 595               | 44,574,956  | PRJNA557218 | SAMN12391618 |
| MINT_ED                     | Mate pair 10kb                      | 150              | Paired end         | 632               | 43,738,395  | PRJNA557218 | SAMN12391618 |
| MINT_EN                     | RNAseq: closed flower buds          | 150              | Paired end         | 290               | 29,523,126  | PRJNA529674 | SAMN11475949 |
| MINT_EO                     | RNAseq: immature leaf               | 150              | Paired end         | 349               | 30,998,008  | PRJNA529674 | SAMN11475950 |
| MINT_EP                     | RNAseq: mature leaf                 | 150              | Paired end         | 332               | 31,767,798  | PRJNA529674 | SAMN11475951 |
| MINT_EQ                     | RNAseq: open flowers                | 150              | Paired end         | 240               | 27,980,687  | PRJNA529674 | SAMN11475952 |
| MINT_ER                     | RNAseq: petiole                     | 150              | Paired end         | 291               | 39,296,506  | PRJNA529674 | SAMN11475953 |
| MINT_ES                     | RNAseq: root                        | 150              | Paired end         | 362               | 38,808,562  | PRJNA529674 | SAMN11475954 |
| MINT_ET                     | RNAseq: stem                        | 150              | Paired end         | 302               | 39,126,095  | PRJNA529674 | SAMN11475955 |



**Table S2. Libraries used in assembly and annotation of *N. mussinii***

| Library ID                                  | Library Type               | Read Length (nt) | Type of Sequencing | Library Size (bp) | Total Reads | Bioproject  | Biosample    |
|---------------------------------------------|----------------------------|------------------|--------------------|-------------------|-------------|-------------|--------------|
| <i>Nepeta mussinii</i> (reference genotype) |                            |                  |                    |                   |             |             |              |
| MINT_EI                                     | Whole genome sequencing    | 150              | Paired end         | 381               | 42,485,828  | PRJNA359989 | SAMN06200308 |
| MINT_EJ                                     | Whole genome sequencing    | 150              | Paired end         | 367               | 49,147,531  | PRJNA557218 | SAMN12391619 |
| MINT_CI                                     | Whole genome sequencing    | 150              | Paired end         | 387               | 15,987,403  | PRJNA359989 | SAMN06200308 |
| MINT_EE                                     | Mate pair 2kb              | 150              | Paired end         | 631               | 46,999,157  | PRJNA557218 | SAMN12391619 |
| MINT_EF                                     | Mate pair 4kb              | 150              | Paired end         | 616               | 37,746,807  | PRJNA557218 | SAMN12391619 |
| MINT_EG                                     | Mate pair 7kb              | 150              | Paired end         | 578               | 46,191,916  | PRJNA557218 | SAMN12391619 |
| MINT_EH                                     | Mate pair 10kb             | 150              | Paired end         | 575               | 51,733,959  | PRJNA557218 | SAMN12391619 |
| MINT_EU                                     | RNAseq: closed flower buds | 150              | Paired end         | 274               | 28,507,931  | PRJNA529674 | SAMN11475956 |
| MINT_EV                                     | RNAseq: immature leaf      | 150              | Paired end         | 311               | 32,035,293  | PRJNA529674 | SAMN11475957 |
| MINT_EW                                     | RNAseq: mature leaf        | 150              | Paired end         | 325               | 35,098,168  | PRJNA529674 | SAMN11475958 |
| MINT_EX                                     | RNAseq: open flowers       | 150              | Paired end         | 325               | 36,437,355  | PRJNA529674 | SAMN11475959 |
| MINT_EY                                     | RNAseq: petiole            | 150              | Paired end         | 339               | 39,058,249  | PRJNA529674 | SAMN11475960 |
| MINT_EZ                                     | RNAseq: root               | 150              | Paired end         | 326               | 41,021,013  | PRJNA529674 | SAMN11475961 |
| MINT_FA                                     | RNAseq: stem               | 150              | Paired end         | 310               | 36,866,609  | PRJNA529674 | SAMN11475962 |

**Table S3. Genome assembly and quality assessment metrics**

|                                     | <i>Hyssopus officinalis</i> | <i>Nepeta cataria</i> | <i>Nepeta mussinii</i> |
|-------------------------------------|-----------------------------|-----------------------|------------------------|
| <i>Assembly metrics</i>             |                             |                       |                        |
| N50 scaffold Size (bp)              | 29,954,448                  | 296,091               | 503,797                |
| Total Assembly Size (bp)            | 341,469,530                 | 494,912,498           | 233,432,308            |
| Number of Scaffolds                 | 1,464                       | 7,710                 | 3,615                  |
| Maximum Scaffold Length (bp)        | 50,735,408                  | 2,006,709             | 4,040,511              |
| Minimum Scaffold Length (bp)        | 895                         | 897                   | 891                    |
| <i>BUSCO metrics</i>                |                             |                       |                        |
| C - Complete BUSCOs                 | 1316 (91.4%)                | 1316 (91.4%)          | 1299 (90.2%)           |
| S - Complete and single-copy BUSCOs | 1245 (86.5%)                | 408 (28.3%)           | 1199 (83.3%)           |
| D - Complete and duplicated BUSCOs  | 71 (4.9%)                   | 908 (63.1%)           | 100 (6.9%)             |
| F - Fragmented BUSCOs               | 33 (2.3%)                   | 25 (1.7%)             | 43 (3.0%)              |
| M - Missing BUSCOs                  | 91 (6.3%)                   | 99 (6.9%)             | 98 (6.8%)              |
| Total BUSCOs                        | 1440                        | 1440                  | 1440                   |

**Table S4. Genome annotation metrics.**

|                                | <i>Hyssopus officinalis</i> |                              | <i>Nepeta cataria</i> |                              | <i>Nepeta mussinii</i> |                              |
|--------------------------------|-----------------------------|------------------------------|-----------------------|------------------------------|------------------------|------------------------------|
|                                | Working<br>Models           | High<br>Confidence<br>Models | Working<br>Models     | High<br>Confidence<br>Models | Working<br>Models      | High<br>Confidence<br>Models |
| Number of Gene Models          | 61,330                      | 50,669                       | 87,501                | 78,876                       | 47,924                 | 42,887                       |
| Number of Loci                 | 40,752                      | 30,421                       | 54,395                | 46,187                       | 30,147                 | 25,403                       |
| Maximum Transcript Length (bp) | 17,511                      | 17,511                       | 16,296                | 15,707                       | 16,657                 | 15,706                       |
| Maximum CDS Length (bp)        | 17,511                      | 17,511                       | 16,158                | 15,210                       | 16,233                 | 15,210                       |
| Average Transcript Length (bp) | 1,597.3                     | 1,819.4                      | 1,730.0               | 1,841.0                      | 1,802.3                | 1,920.3                      |
| Average CDS Length (bp)        | 1,162.3                     | 1,299.9                      | 1,251.3               | 1,319.6                      | 1,280.9                | 1,350.6                      |
| Average Exon Length (bp)       | 293.5                       | 297.0                        | 283.2                 | 285.9                        | 299.3                  | 302.2                        |
| Average Intron Length (bp)     | 335.7                       | 326.0                        | 352.0                 | 346.2                        | 340.6                  | 335.5                        |
| Single Exon Transcripts        | 22,650                      | 14,268                       | 20,292                | 16,162                       | 12,370                 | 9,696                        |

**Table S5. Species acronyms and sequence origins.** Acronyms of species used in phylogenetic analyses, and origins of sequence data. Sequences labelled “Mint Genome Project” sequences are those reported in (Mint Evolutionary Genomics Consortium, 2019 (7)).

| Acronym | Taxon                                                                              | Origin                                                  |
|---------|------------------------------------------------------------------------------------|---------------------------------------------------------|
| AGFO    | <i>Agastache foeniculum</i> (Pursh) Kuntze                                         | Mint Genome Project                                     |
| AJRE    | <i>Ajuga reptans</i> L.                                                            | Mint Genome Project                                     |
| AmTr    | <i>Amborella trichopoda</i> Baill.                                                 | Mint Genome Project (Phytozome)                         |
| Am      | <i>Antirrhinum majus</i> L.                                                        | NCBI/EBI GenBank                                        |
| At      | <i>Arabidopsis thaliana</i> (L.) Heynh.                                            | NCBI/EBI GenBank                                        |
| AUPE    | <i>Aureolaria pectinata</i> (Nutt.) Pennell                                        | Mint Genome Project                                     |
| BAPS    | <i>Ballota pseudodictamnus</i> (L.) Benth.                                         | Mint Genome Project                                     |
| BEOF    | <i>Betonica officinalis</i> L.<br>[syn. <i>Stachys officinalis</i> (L.) Trevis.]   | Mint Genome Project                                     |
| CAAM    | <i>Callicarpa americana</i> L.                                                     | Mint Genome Project                                     |
| Cr      | <i>Catharanthus roseus</i> (L.) G.Don                                              | Mint Genome Project (Medicinal Plant Genomics Resource) |
| CLBU    | <i>Clerodendrum bungei</i> Steud.                                                  | Mint Genome Project                                     |
| COCA    | <i>Collinsonia canadensis</i> L.                                                   | Mint Genome Project                                     |
| COTO    | <i>Congea tomentosa</i> Roxb.                                                      | Mint Genome Project                                     |
| COPY    | <i>Cornutia pyramidata</i> L.                                                      | Mint Genome Project                                     |
| ERGU    | <i>Erythranthe guttata</i> (DC.) G.L. Nesom<br>[syn. <i>Mimulus guttatus</i> DC. ] | NCBI/EBI GenBank                                        |
| GLHE    | <i>Glechoma hederacea</i> L.                                                       | Mint Genome Project                                     |
| GMPH    | <i>Gmelina philippensis</i> Cham.                                                  | Mint Genome Project                                     |
| HOSA    | <i>Holmskioldia sanguinea</i> Retz.                                                | Mint Genome Project                                     |
| HYSU    | <i>Hyptis suaveolens</i> (L.) Poit.                                                | Mint Genome Project                                     |
| HYOF    | <i>Hyssopus officinalis</i> L.                                                     | This work                                               |
| ISRU    | <i>Isodon rubescens</i> (Hemsl.) H.Hara                                            | NCBI/EB SRA                                             |
| JURE    | <i>Juglans regia</i> L.                                                            | NCBI/EBI GenBank                                        |
| LAAL    | <i>Lamium album</i> L.                                                             | Mint Genome Project                                     |
| LATI    | <i>Lancea tibetica</i> Hook.f. & Thomson                                           | Mint Genome Project                                     |
| LAAN    | <i>Lavandula angustifolia</i> Mill.                                                | Mint Genome Project                                     |
| LELE    | <i>Leonotis leonurus</i> (L.) R.Br.                                                | Mint Genome Project                                     |
| LECA    | <i>Leonurus cardiaca</i> L.                                                        | Mint Genome Project                                     |
| LYAM    | <i>Lycopus americanus</i> Muhl. ex<br>W.P.C.Barton                                 | Mint Genome Project                                     |
| MAVU    | <i>Marrubium vulgare</i> L.                                                        | Mint Genome Project                                     |
| MEOF    | <i>Melissa officinalis</i> L.                                                      | Mint Genome Project                                     |
| MEPI    | <i>Mentha x piperita</i> L.                                                        | Mint Genome Project                                     |
| MEAQ    | <i>Mentha aquatica</i> L.                                                          | Mint Genomics Resource (Lange lab)                      |
| MELO    | <i>Mentha longifolia</i> (L.) L.                                                   | Mint Genomics Resource (Lange lab) (77)                 |
| MESP    | <i>Mentha spicata</i> L.                                                           | Mint Genome Project                                     |
| MEPI_B  | <i>Mentha x piperita</i> L.                                                        | Mint Genomics Resource (Lange lab)                      |
| Mp      | <i>Mentha x piperita</i> L.                                                        | NCBI/EBI GenBank                                        |
| MODI    | <i>Monarda didyma</i> L.                                                           | Mint Genome Project                                     |

**Table S5.** Continued.

| <b>Acronym</b> | <b>Taxon</b>                                         | <b>Origin</b>                   |
|----------------|------------------------------------------------------|---------------------------------|
| NECA           | <i>Nepeta cataria</i> L.                             | This work                       |
| NEMU           | <i>Nepeta mussinii</i> Spreng. ex Henckel.           | This work                       |
| OCAM           | <i>Ocimum americanum</i> L.                          | NCBI/EB SRA                     |
| OCBA           | <i>Ocimum basilicum</i> L.                           | Mint Genome Project             |
| OCTE           | <i>Ocimum tenuiflorum</i> L.                         | NCBI/EB SRA                     |
| Oe             | <i>Olea europaea</i> L.                              | NCBI/EBI GenBank                |
| ORMA           | <i>Origanum majorana</i> L.                          | Mint Genome Project             |
| ORVU           | <i>Origanum vulgare</i> L.                           | Mint Genome Project             |
| PATO           | <i>Paulownia tomentosa</i> (Thunb.) Steud.           | Mint Genome Project             |
| PEFR           | <i>Perilla frutescens</i> (L.) Britton               | Mint Genome Project             |
| PEAT           | <i>Perovskia atriplicifolia</i> Benth.               | Mint Genome Project             |
| PEBA           | <i>Petraeovites bambusetorum</i> King & Gamble       | Mint Genome Project             |
| PEVO           | <i>Petrea volubilis</i> L.                           | Mint Genome Project             |
| PHFR           | <i>Phlomis fruticosa</i> L.                          | Mint Genome Project             |
| PHPU           | <i>Phlomis purpurea</i> L.                           | NCBI/EB SRA                     |
| Pp             | <i>Physcomitrella patens</i> (Hedw.) Bruch & Schimp. | Mint Genome Project (Phytosome) |
| Pm             | <i>Plantago major</i> L.                             | NCBI/EBI GenBank                |
| PLBA           | <i>Plectranthus barbatus</i> Andrews                 | Mint Genome Project             |
| POCA           | <i>Pogostemon cablin</i> (Blanco) Benth.             | Mint Genome Project             |
| PRMI           | <i>Premna microphylla</i> Turcz.                     | Mint Genome Project             |
| PRLA           | <i>Prostanthera lasianthos</i> Labill.               | Mint Genome Project             |
| PRVU           | <i>Prunella vulgaris</i> L.                          | Mint Genome Project             |
| Ro             | <i>Rosmarinus officinalis</i> L.                     | NCBI/EBI GenBank                |
| ROOF           | <i>Rosmarinus officinalis</i> L.                     | Mint Genome Project             |
| ROMY           | <i>Rotheca myricoides</i> (Hochst.) Steane & Mabb.   | Mint Genome Project             |
| SAHI           | <i>Salvia hispanica</i> L.                           | Mint Genome Project             |
| SAMI           | <i>Salvia miltiorrhiza</i> Bunge                     | NCBI/EB SRA (78)                |
| SAOF           | <i>Salvia officinalis</i> L.                         | Mint Genome Project             |
| SASC           | <i>Salvia sclarea</i> L.                             | NCBI/EB SRA                     |
| SCBA           | <i>Scutellaria baicalensis</i> Georgi                | Mint Genome Project             |
| Sm             | <i>Selaginella moellendorffii</i> Hieron.            | Mint Genome Project (Phytosome) |
| SEIN           | <i>Sesamum indicum</i> L.                            | NCBI/EBI GenBank                |
| TEGR           | <i>Tectona grandis</i> L.f.                          | Mint Genome Project (41)        |
| TECA           | <i>Teucrium canadense</i> L.                         | Mint Genome Project             |
| Ts             | <i>Thymus serpyllum</i> L.                           | NCBI/EBI GenBank                |
| THVU           | <i>Thymus vulgaris</i> L.                            | Mint Genome Project             |
| Tv             | <i>Thymus vulgaris</i> L.                            | NCBI/EBI GenBank                |
| Tc             | <i>Thymus x citriodorus</i> (Pers.) Schreb.          | NCBI/EBI GenBank                |
| VIAG           | <i>Vitex agnus-castus</i> L.                         | Mint Genome Project             |
| WEFR           | <i>Westringia fruticosa</i> (Willd.) Druce           | Mint Genome Project             |

**Table S6. Libraries used in *Nepeta mussinii* diversity panel**

| Library ID                             | Library Type                              | Read Length (nt) | Type of Sequencing | Library Size (bp) | Total Reads | Bioproject  | Biosample    |
|----------------------------------------|-------------------------------------------|------------------|--------------------|-------------------|-------------|-------------|--------------|
| <i>Nepeta mussinii</i> Diversity Panel |                                           |                  |                    |                   |             |             |              |
| NEP_AF                                 | RNAseq: young leaf replicate A, plant B1B | 50               | Single end         | 301               | 30,482,538  | PRJNA557218 | SAMN12391686 |
| NEP_AG                                 | RNAseq: young leaf replicate B, plant B1B | 50               | Single end         | 339               | 36,076,107  | PRJNA557218 | SAMN12391686 |
| NEP_AH                                 | RNAseq: young leaf replicate C, plant B1B | 50               | Single end         | 247               | 35,574,798  | PRJNA557218 | SAMN12391686 |
| NEP_AI                                 | RNAseq: young leaf replicate A, plant B1C | 50               | Single end         | 282               | 45,257,016  | PRJNA557218 | SAMN12391687 |
| NEP_AJ                                 | RNAseq: young leaf replicate B, plant B1C | 50               | Single end         | 301               | 53,673,445  | PRJNA557218 | SAMN12391687 |
| NEP_AK                                 | RNAseq: young leaf replicate C, plant B1C | 50               | Single end         | 281               | 42,400,576  | PRJNA557218 | SAMN12391687 |
| NEP_AL                                 | RNAseq: young leaf replicate A, plant B1E | 50               | Single end         | 317               | 25,879,664  | PRJNA557218 | SAMN12391688 |
| NEP_AM                                 | RNAseq: young leaf replicate B, plant B1E | 50               | Single end         | 275               | 33,983,367  | PRJNA557218 | SAMN12391688 |
| NEP_AN                                 | RNAseq: young leaf replicate C, plant B1E | 50               | Single end         | 281               | 38,554,164  | PRJNA557218 | SAMN12391688 |
| NEP_BA                                 | RNAseq: young leaf replicate A, plant 5   | 50               | Single end         | 278               | 31,832,160  | PRJNA557218 | SAMN12391689 |
| NEP_BB                                 | RNAseq: young leaf replicate B, plant 5   | 50               | Single end         | 277               | 46,535,207  | PRJNA557218 | SAMN12391689 |
| NEP_BC                                 | RNAseq: young leaf replicate C, plant 5   | 50               | Single end         | 283               | 29,930,382  | PRJNA557218 | SAMN12391689 |
| NEP_BD                                 | RNAseq: young leaf replicate A, plant 7   | 50               | Single end         | 291               | 44,028,302  | PRJNA557218 | SAMN12391690 |
| NEP_BE                                 | RNAseq: young leaf replicate B, plant 7   | 50               | Single end         | 270               | 33,053,357  | PRJNA557218 | SAMN12391690 |
| NEP_BF                                 | RNAseq: young leaf replicate C, plant 7   | 50               | Single end         | 291               | 33,222,611  | PRJNA557218 | SAMN12391690 |
| MINT_EU*                               | RNAseq: closed flower buds                | 150              | Paired end         | 274               | 28,507,931  | PRJNA529674 | SAMN11475956 |
| MINT_EV*                               | RNAseq: immature leaf                     | 150              | Paired end         | 311               | 32,035,293  | PRJNA529674 | SAMN11475957 |
| MINT_EW*                               | RNAseq: mature leaf                       | 150              | Paired end         | 325               | 35,098,168  | PRJNA529674 | SAMN11475958 |
| MINT_EX*                               | RNAseq: open flowers                      | 150              | Paired end         | 325               | 36,437,355  | PRJNA529674 | SAMN11475959 |
| MINT_EY*                               | RNAseq: petiole                           | 150              | Paired end         | 339               | 39,058,249  | PRJNA529674 | SAMN11475960 |
| MINT_EZ*                               | RNAseq: root                              | 150              | Paired end         | 326               | 41,021,013  | PRJNA529674 | SAMN11475961 |
| MINT_FA*                               | RNAseq: stem                              | 150              | Paired end         | 310               | 36,866,609  | PRJNA529674 | SAMN11475962 |

\*Read 1 was clipped to 50bp for use in comparison with diversity panel data

**Table S7. *P5βR* locus synteny.** Synteny between *H. officinalis* (ho), *N. cataria* (nc), and *N. mussinii* (nm) at the *P5βR* locus. Syntenic region identified using MCScanX; only a portion of the syntenic block is shown. The synteny between *SISYs* and *P5βRs* was adjusted manually based on phylogenetic relationships. The *SISY* genes are in bold; the *P5βR* genes are underlined. The *N. cataria SISYB* pseudogene was identified using blast/homology but does not have a gene model name. Hyssop *P5βRB* may be syntenic to either *Nepeta SISYs* or *P5βRs*.

| <b>nc7</b>                        | <b>nc12</b>                       | <b>nm64</b>                       | <b>ho8</b>                         |
|-----------------------------------|-----------------------------------|-----------------------------------|------------------------------------|
| nc_g2176.t1                       | nc_g3337.t1                       | nm_g14127.t1_g14128.t1            |                                    |
| nc_g2177.t1                       | nc_g3336.t1                       | nm_g14129.t1                      |                                    |
| nc_g2178.t1                       | nc_g3335.t1                       | nm_g14130.t1                      | ho_g31829.t1                       |
| nc_g2179.t1                       |                                   |                                   |                                    |
| nc_g2180.t1                       | nc_g3334.t1                       | nm_g14131.t1                      |                                    |
| nc_g2181.t1                       | nc_g3333.t1                       | nm_g14132.t1                      |                                    |
| nc_g2182.t1                       | nc_g3330.t1                       | nm_g14133.t1                      |                                    |
| nc_g2183.t1                       | nc_g3329.t1                       | nm_g14134.t1                      |                                    |
| nc_g2184.t1                       | nc_g3327.t1                       | nm_g14136.t1                      |                                    |
| nc_g2185.t1                       | nc_g3326.t1                       | nm_g14137.t1                      |                                    |
| <b>nc_g2186.t1 (<i>SISYA</i>)</b> | <b>(<i>SISYB</i>)</b>             | <b>nm_g14138.t1 (<i>SISY</i>)</b> |                                    |
| <u>nc_g2187.t1 (<i>P5βRA</i>)</u> | <u>nc_g3323.t1 (<i>P5βRA</i>)</u> | <u>nm_g14139.t1 (<i>P5βR</i>)</u> | <u>ho_g31854.t1 (<i>P5βRB</i>)</u> |
| nc_g2188.t1                       | nc_g3322.t1                       | nm_g14140.t1                      | ho_g31860.t1                       |
| nc_g2189.t1                       | nc_g3319.t1                       | nm_g14142.t1                      | ho_g31862.t1                       |
| nc_g2190.t1                       | nc_g3318.t1                       | nm_g14143.t1                      | ho_g31871.t1                       |
| nc_g2191.t1                       | nc_g3317.t1                       | nm_g14144.t1                      | ho_g31873.t1                       |
| nc_g2192.t1                       | nc_g3315.t1                       |                                   | ho_g31874.t1                       |
| nc_g2193.t1                       |                                   | nm_g14145.t1                      |                                    |
| nc_g2194.t1                       |                                   |                                   |                                    |
| nc_g2196.t1                       | nc_g3314.t1                       | nm_g14148.t1                      | ho_g31877.t1                       |
| nc_g2197.t1                       | nc_g3312.t1                       | nm_g14150.t1_g14151.t1            | ho_g31880.t1.                      |
| nc_g2198.t1                       | nc_g3311.t1.                      | nm_g14152.t1                      | ho_g31881.t1                       |

**Table S8. Kinetic analysis of iridoid synthase (ISY) reaction for selected PRISE enzymes.**

Initial rates were obtained by measuring reduction of 8-oxogeranial through depletion of NADPH (absorbance at 340 nm). Rates at 1.5625, 3.125, 6.25, 12.5, 25, 50 or 100  $\mu\text{M}$  8-oxogeranial were measured. Michaelis-Menten or substrate inhibition models were fit to initial rate data; estimated parameters and associated significance ( $p$ -value) is presented.

| Enzyme | $k_{\text{cat}}$ ( $\text{s}^{-1}$ ) | $p$    | $K_m$ ( $\mu\text{M}$ ) | $p$    | $K_i$ ( $\mu\text{M}$ ) | $p$   | $k_{\text{cat}}/K_M$ ( $\text{mM}^{-1} \text{s}^{-1}$ ) | $n$ | [E] (nM)   |
|--------|--------------------------------------|--------|-------------------------|--------|-------------------------|-------|---------------------------------------------------------|-----|------------|
| Anc1   | 0.155 $\pm$ 0.008                    | <0.001 | 2.5 $\pm$ 0.6           | <0.001 |                         |       | 62.0                                                    | 22  | 25 or 100  |
| Anc2   | 0.079 $\pm$ 0.004                    | <0.001 | 0.7 $\pm$ 0.3           | 0.032  |                         |       | 113                                                     | 24  | 200        |
| NmP5BR | 0.0075 $\pm$ 0.0004                  | <0.001 | 1.9 $\pm$ 0.5           | 0.0015 |                         |       | 3.95                                                    | 32  | 250 or 300 |
| Anc3   | 1.00 $\pm$ 0.07                      | <0.001 | 0.9 $\pm$ 0.4           | 0.047  | 229 $\pm$ 86            | 0.016 | 1110                                                    | 21  | 10         |
| NmSISY | 0.277 $\pm$ 0.015                    | <0.001 | 3.6 $\pm$ 0.8           | <0.001 |                         |       | 76.9                                                    | 32  | 50         |
| NmISY  | 3.50 $\pm$ 0.48                      | <0.001 | 2.1 $\pm$ 1.0           | 0.05   | 77 $\pm$ 28             | 0.01  | 1670                                                    | 26  | 10         |



**Table S9. Positive selection analysis of *PRISE* genes.**

Selection analysis conducted with codeml software using subsampled *PRISE* tree. Tree and branch annotations can be found on fig. S23. The M0 model was used to select codon model via Bayesian information criterion (BIC), using number of informative codon patterns as  $n$  (376). The branch-site model MA was used to test for positive selection on selected branches. P-values were calculated using the  $\chi^2$  distribution and adjusted with Benjamini-Hochberg multiple test correction.

| Model | Codon model | Branch | lnL       | df  | BIC      | 2 $\Delta$ lnL | $p$     | $p$ -corrected |
|-------|-------------|--------|-----------|-----|----------|----------------|---------|----------------|
| M0    | equal       | NA     | -23324.59 | 167 | 47639.41 |                |         |                |
| M0    | F1X4+F      | NA     | -23471.90 | 167 | 47934.05 |                |         |                |
| M0    | F1X4        | NA     | -23302.31 | 170 | 47612.64 |                |         |                |
| M0    | F3X4+F      | NA     | -23483.61 | 167 | 47957.45 |                |         |                |
| M0    | F3X4        | NA     | -23192.69 | 176 | 47428.99 |                |         |                |
| M0    | Fcodon+F    | NA     | -23696.63 | 167 | 48383.51 |                |         |                |
| M0    | Fcodon      | NA     | -23059.02 | 227 | 47464.06 |                |         |                |
| M0    | fMutSel0+F  | NA     | -23117.37 | 170 | 47242.77 |                |         |                |
| M0    | fMutSel0    | NA     | -23094.45 | 189 | 47309.59 |                |         |                |
| M0    | fMutSel+F   | NA     | -23005.95 | 170 | 47019.93 |                |         |                |
| M0    | fMutSel     | NA     | -22903.77 | 230 | 47171.35 |                |         |                |
| MA_H0 | fMutSel+F   | c      | -22455.28 | 172 | 45930.45 |                |         |                |
| MA_H1 | fMutSel+F   | c      | -22451.25 | 173 | 45928.32 | 8.06           | 0.00453 | 0.023          |
| MA_H0 | fMutSel+F   | a      | -22460.71 | 172 | 45941.3  |                |         |                |
| MA_H1 | fMutSel+F   | a      | -22460.71 | 173 | 45947.23 | 0.00           | 1       | 1              |
| MA_H0 | fMutSel+F   | b      | -22460.71 | 172 | 45941.3  |                |         |                |
| MA_H1 | fMutSel+F   | b      | -22459.85 | 173 | 45945.52 | 1.71           | 0.1908  | 0.318          |
| MA_H0 | fMutSel+F   | e      | -22459.65 | 172 | 45939.2  |                |         |                |
| MA_H1 | fMutSel+F   | e      | -22458.11 | 173 | 45942.04 | 3.09           | 0.0788  | 0.197          |
| MA_H0 | fMutSel+F   | d      | -22458.68 | 172 | 45937.25 |                |         |                |
| MA_H1 | fMutSel+F   | d      | -22458.68 | 173 | 45943.18 | 0.00           | 1       | 1              |

**Table S10. *GES* locus synteny.** Synteny between *H. officinalis* (ho), *N. cataria* (nc), and *N. mussinii* (nm) at the geraniol synthase (*GES*) locus. Syntenic region identified using MCScanX; only a portion of the syntenic block is shown. The *GES* genes are in bold. The *N. mussinii* *SGES* (g13037) is a pseudogene, whilst the active *GES* is in the *NEPS* locus (Fig. 3A).

| <b>nc1</b>                      | <b>nc238</b>                      | <b>nm54</b>                       | <b>ho9</b>                       |
|---------------------------------|-----------------------------------|-----------------------------------|----------------------------------|
| nc_g409.t1                      | nc_g26145.t1                      | nm_g13049.t1                      | ho_g33517.t1                     |
| nc_g410.t1                      | nc_g26144.t1                      | nm_g13048.t1                      | ho_g33510.t1                     |
| nc_g411.t1                      | nc_g26143.t1                      | nm_g13047.t1                      | ho_g33509.t1                     |
| nc_g412.t1_g413.t1              | nc_g26141.t1                      | nm_g13046.t1                      | ho_g33508.t1                     |
| nc_g414.t1                      | nc_g26140.t1                      |                                   | ho_g33506.t1                     |
| nc_g415.t1                      | nc_g26139.t1                      |                                   | ho_g33505.t1                     |
| nc_g416.t1                      |                                   | nm_g13044.t1                      | ho_g33504.t1                     |
| nc_g417.t1                      |                                   | nm_g13043.t1                      | ho_g33503.t1                     |
| nc_g418.t1                      |                                   | nm_g13042.t1                      | ho_g33502.t1                     |
| nc_g419.t1                      |                                   |                                   |                                  |
| nc_g420.t1                      |                                   | nm_g13041.t1                      | ho_g33500.t1                     |
| nc_g421.t1                      | nc_g26134.t1                      | nm_g13038.t1                      | ho_g33497.t1                     |
| nc_g422.t1                      |                                   |                                   |                                  |
| nc_g424.t1                      |                                   |                                   |                                  |
| <b>nc_g426.t1 (<i>GESB</i>)</b> | <b>nc_g26133.t1 (<i>GESA</i>)</b> | <b>nm_g13037.t1 (<i>SGES</i>)</b> | <b>ho_g33496.t1 (<i>GES</i>)</b> |
| nc_g427.t1                      | nc_g26131.t1                      | nm_g13036.t1                      | ho_g33494.t1                     |
| nc_g428.t1                      |                                   |                                   |                                  |
| nc_g429.t1                      | nc_g26128.t1                      |                                   |                                  |
| nc_g430.t1                      |                                   |                                   | ho_g33491.t1                     |
| nc_g431.t1                      | nc_g26127.t1                      |                                   | ho_g33489.t1                     |
| nc_g432.t1_g433.t1              | nc_g26126.t1                      | nm_g13034.t1                      | ho_g33488.t2                     |
| nc_g434.t1                      | nc_g26124.t1                      | nm_g13033.t1                      | ho_g33487.t1                     |
| nc_g435.t1                      | nc_g26123.t1                      | nm_g13032.t1                      | ho_g33486.t1                     |
| nc_g436.t1                      | nc_g26122.t1                      | nm_g13031.t1                      | ho_g33481.t1                     |
| nc_g437.t1                      | nc_temp_model_24.2.5b2<br>d6aea   | nm_g13030.t1                      | ho_g33480.t1                     |

## REFERENCES AND NOTES

1. A. O. Tucker, S. S. Tucker, Catnip and the catnip response I. *Econ. Bot.* **42**, 214–231 (1988).
2. S. Bol, J. Caspers, L. Buckingham, G. D. Anderson-Shelton, C. Ridgway, C. A. Buffington, S. Schulz, E. M. Bunnik, Responsiveness of cats (Felidae) to silver vine (*Actinidia polygama*), Tatarian honeysuckle (*Lonicera tatarica*), valerian (*Valeriana officinalis*) and catnip (*Nepeta cataria*). *BMC Vet. Res.* **13**, 70 (2017).
3. T. Eisner, Catnip: Its raison d'être. *Science* **146**, 1318–1320 (1964).
4. M. A. Birkett, A. Hassanali, S. Hoglund, J. Pettersson, J. A. Pickett, Repellent activity of catmint, *Nepeta cataria*, and iridoid nepetalactone isomers against Afro-tropical mosquitoes, ixodid ticks and red poultry mites. *Phytochemistry* **72**, 109–114 (2011).
5. K. Miettinen, L. Dong, N. Navrot, T. Schneider, V. Burlat, J. Pollier, L. Woittiez, S. van der Krol, R. Lugan, T. Ilc, R. Verpoorte, Kirsi-Marja Oksman-Caldentey, E. Martinoia, H. Bouwmeester, A. Goossens, J. Memelink, D. Werck-Reichhart, The seco-iridoid pathway from *Catharanthus roseus*. *Nat. Commun.* **5**, 3606 (2014).
6. F. Geu-Flores, N. H. Sherden, V. Courdavault, V. Burlat, W. S. Glenn, C. Wu, E. Nims, Y. Cui, Sarah E. O'Connor, An alternative route to cyclic terpenes by reductive cyclization in iridoid biosynthesis. *Nature* **492**, 138–142 (2012).
7. N. H. Sherden, B. Lichman, L. Caputi, D. Zhao, M. O. Kamileen, C. R. Buell, S. E. O'Connor, Identification of iridoid synthases from *Nepeta* species: Iridoid cyclization does not determine nepetalactone stereochemistry. *Phytochemistry* **145**, 48–56 (2018).
8. H. Kries, F. Kellner, M. O. Kamileen, S. E. O'Connor, Inverted stereocontrol of iridoid synthase in snapdragon. *J. Biol. Chem.* **292**, 14659–14667 (2017).
9. B. R. Lichman, M. O. Kamileen, G. R. Titchiner, G. Saalbach, CE. M. Stevenson, D. M. Lawson, S. E. O'Connor, Uncoupled activation and cyclisation in catmint reductive terpenoid biosynthesis. *Nat. Chem. Biol.* **15**, 71–79 (2019).

10. Mint Evolutionary Genomics Consortium, Phylogenomic mining of the mints reveals multiple mechanisms contributing to the evolution of chemical diversity in Lamiaceae. *Mol. Plant* **11**, 1084–1096 (2018).
11. G. W. Stull, M. Schori, D. E. Soltis, P. S. Soltis, Character evolution and missing (morphological) data across Asteridae. *Am. J. Bot.* **105**, 470–479 (2018).
12. S. Dobler, G. Petschenka, H. Pankoke, Coping with toxic plant compounds - The insect's perspective on iridoid glycosides and cardenolides. *Phytochemistry* **72**, 1593–1604 (2011).
13. J. L. Magnard, A. Rocchia, J. C. Caissard, P. Vergne, P. Sun, R. Hecquet, A. Dubois, L. Hibrand-Saint Oyant, F. Jullien, F. Nicolè, O. Raymond, S. Huguet, R. Baltenweck, S. Meyer, P. Claudel, J. Jeauffre, M. Rohmer, F. Foucher, P. Hugueney, M. Bendahmane, S. Baudino, Biosynthesis of monoterpene scent compounds in roses. *Science* **349**, 81–83 (2015).
14. J. Petersen, H. Lanig, J. Munkert, P. Bauer, F. Müller-Uri, W. Kreis, Progesterone 5 $\beta$ -reductases/iridoid synthases (PRISE): Gatekeeper role of highly conserved phenylalanines in substrate preference and trapping is supported by molecular dynamics simulations. *J. Biomol. Struct. Dyn.* **34**, 1667–1680 (2016).
15. H. W. Nützmann, A. Huang, A. Osbourn, Plant metabolic clusters – From genetics to genomics. *New Phytol.* **211**, 771–789 (2016).
16. I. Liblikas, E. M. Santangelo, J. Sandell, P. Baeckström, M. Svensson, U. Jacobsson, C. R. Unelius, Simplified isolation procedure and interconversion of the diastereomers of nepetalactone and nepetalactol. *J. Nat. Prod.* **68**, 886–890 (2005).
17. I. Gabur, H. S. Chawla, R. J. Snowdon, I. A. P. Parkin, Connecting genome structural variation with complex traits in crop plants. *Theor. Appl. Genet.* **132**, 733–750 (2019).
18. S. Brown, M. Clastre, V. Courdavault, S. E. O'Connor, De novo production of the plant-derived alkaloid strictosidine in yeast. *Proc. Natl. Acad. Sci. U.S.A.* **112**, 3205–3210 (2015).

19. G. D. Moghe, R. L. Last, Something old, something new: Conserved enzymes and the evolution of novelty in plant specialized metabolism. *Plant Physiol.* **169**, 1512–1523 (2015).
20. B. Christ, C. Xu, M. Xu, F.-S. Li, N. Wada, A. J. Mitchell, X.-L. Han, M.-L. Wen, M. Fujita, J.-K. Weng, Repeated evolution of cytochrome P450-mediated spiroketal steroid biosynthesis in plants. *Nat. Commun.* **10**, 3206 (2019).
21. R. Huang, A. J. O'Donnell, J. J. Barboline, T. J. Barkman, Convergent evolution of caffeine in plants by co-option of exapted ancestral enzymes. *Proc. Natl. Acad. Sci. U.S.A.* **113**, 10613–10618 (2016).
22. M. Kaltenbach, J. R. Burke, M. Dindo, A. Pabis, F. S. Munsberg, A. Rabin, S. C. L. Kamerlin, J. P. Noel, D. S. Tawfik, Evolution of chalcone isomerase from a noncatalytic ancestor. *Nat. Chem. Biol.* **14**, 548–555 (2018).
23. P. Bauer, J. Munkert, M. Brydziun, E. Burda, F. Müller-Uri, H. Gröger, Y. A. Muller, W. Kreis, Highly conserved progesterone 5 $\beta$ -reductase genes (P5 $\beta$ R) from 5 $\beta$ -cardenolide-free and 5 $\beta$ -cardenolide-producing angiosperms. *Phytochemistry* **71**, 1495–1505 (2010).
24. I. B. Rogozin, F. Belinky, V. Pavlenko, S. A. Shabalina, D. M. Kristensen, E. V. Koonin, Evolutionary switches between two serine codon sets are driven by selection. *Proc. Natl. Acad. Sci. U.S.A.* **113**, 13109–13113 (2016).
25. Y. Matsuba T. T. Nguyen, K. Wiegert, V. Falara, E. Gonzales-Vigil, B. Leong, P. Schäfer, D. Kudrna, R. A. Wing, A. M. Bolger, B. Usadel, A. Tissier, A. R. Fernie, C. S. Barry, E. Pichersky, Evolution of a complex locus for terpene biosynthesis in *Solanum*. *Plant Cell* **25**, 2022–2036 (2013).
26. K. Miyamoto, M. Fujita, M. R. Shenton, S. Akashi, C. Sugawara, A. Sakai, K. Horie, M. Hasegawa, H. Kawaide, W. Mitsushashi, H. Nojiri, H. Yamane, N. Kurata, K. Okada, T. Toyomasu, Evolutionary trajectory of phytoalexin biosynthetic gene clusters in rice. *Plant J.* **87**, 293–304 (2016).

27. A. M. Pohlit, N. P. Lopes, R. A. Gama, W. P. Tadei, V. F. Andrade-Neto, Patent literature on mosquito repellent inventions which contain plant essential oils—A review. *Planta Med.* **77**, 598–617 (2011).
28. G. Dawson, D. C. Griffiths, N. F. Janes, A. Mudd, J. A. Pickett, L. J. Wadhams, C. M. Woodcock, D. C. Griffiths, N. F. Janes, A. Mudd, J. A. Pickett, L. J. Wadhams, C. M. Woodcock, Identification of an aphid sex pheromone. *Nature* **325**, 614–616 (1987).
29. S. Koczor, F. Szentkirályi, M. A. Birkett, J. A. Pickett, E. Voigt, M. Tóth, Attraction of *Chrysoperla carnea* complex and *Chrysopa* spp. lacewings (Neuroptera: Chrysopidae) to aphid sex pheromone components and a synthetic blend of floral compounds in Hungary. *Pest Manag. Sci.* **66**, 1374–1379 (2010).
30. C. Li, X. L. Zhang, X. Y. Xue, F. F. Zhang, Q. Xu, X. M. Liang, Structural characterization of iridoid glucosides by ultra-performance liquid chromatography/electrospray ionization quadrupole time-of-flight tandem mass spectrometry. *Rapid Commun. Mass Spectrom.* **22**, 1941–1954 (2008).
31. C. Formisano, D. Rigano, F. Senatore, Chemical constituents and biological activities of *Nepeta* species. *Chem. Biodivers.* **8**, 1783–1818 (2011).
32. M. A. Saghai-Marooif, K. M. Soliman, R. A. Jorgensen, R. W. Allard, Ribosomal DNA spacer-length polymorphisms in barley: Mendelian inheritance, chromosomal location, and population-dynamics. *Proc. Natl. Acad. Sci. U.S.A.* **81**, 8014–8018 (1984).
33. D. Zhao, J. P. Hamilton, G. M. Pham, E. Crisovan, K. Wiegert-Rininger, B. Vaillancourt, D. Della Penna, C. R. Buell, De novo genome assembly of *Camptotheca acuminata*, a natural source of the anti-cancer compound camptothecin. *Gigascience* **6**, 1–7 (2017).
34. M. Martin, Cutadapt removes adapter sequences from high-throughput sequencing reads. *EMBnet J.* **17**, 10–12 (2011).
35. R. M. Leggett, B. J. Clavijo, L. Clissold, M. D. Clark, M. Caccamo, NextClip: An analysis and read preparation tool for Nextera Long Mate Pair libraries. *Bioinformatics* **30**, 566–568 (2014).

36. S. Gnerre, I. Maccallum, D. Przybylski, F. J. Ribeiro, J. N. Burton, B. J. Walker, T. Sharpe, G. Hall, T. P. Shea, S. Sykes, A. M. Berlin, D. Aird, M. Costello, R. Daza, L. Williams, R. Nicol, A. Gnrirke, C. Nusbaum, E. S. Lander, D. B. Jaffe, High-quality draft assemblies of mammalian genomes from massively parallel sequence data. *Proc. Natl. Acad. Sci. U.S.A.* **108**, 1513–1518 (2011).
37. D. M. Bickhart, B. D. Rosen, S. Koren, B. L. Sayre, A. R. Hastie, S. Chan, J. Lee, E. T. Lam, I. Liachko, S. T. Sullivan, J. N. Burton, H. J. Huson, J. C. Nystrom, C. M. Kelley, J. L. Hutchison, Y. Zhou, J. Sun, A. Crisà, F. A. Ponce de León, J. C. Schwartz, J. A. Hammond, G. C. Waldbieser, S. G. Schroeder, G. E. Liu, M. J. Dunham, J. Shendure, T. S. Sonstegard, A. M. Phillippy, C. P. Van Tassell, T. P. Smith, Single-molecule sequencing and chromatin conformation capture enable de novo reference assembly of the domestic goat genome. *Nat. Genet.* **49**, 643–650 (2017).
38. A. C. English, S. Richards, Y. Han, M. Wang, V. Vee, J. Qu, X. Qin, D. M. Muzny, J. G. Reid, K. C. Worley, R. A. Gibbs, Mind the gap: Upgrading genomes with Pacific Biosciences RS long-read sequencing technology. *PLOS ONE* **7**, e47768 (2012).
39. B. J. Walker, T. Abeel, T. Shea, M. Priest, A. Abouelliel, S. Sakthikumar, C. A. Cuomo, Q. Zeng, J. Wortman, S. K. Young, A. M. Earl, Pilon: An integrated tool for comprehensive microbial variant detection and genome assembly improvement. *PLOS ONE* **9**, e112963 (2014).
40. F. A. Simão, R. M. Waterhouse, P. Ioannidis, E. V Kriventseva, E. M. Zdobnov, BUSCO: Assessing genome assembly and annotation completeness with single-copy orthologs. *Bioinformatics* **31**, 3210–3212 (2015).
41. D. Zhao, J. P. Hamilton, W. W. Bhat, S. R. Johnson, G. T. Godden, T. J. Kinser, B. Boachon, N. Dudareva, D. E. Soltis, P. S. Soltis, B. Hamberger, C. R. Buell, A chromosomal-scale genome assembly of *Tectona grandis* reveals the importance of tandem gene duplication and enables discovery of genes in natural product biosynthetic pathways. *Gigascience* **8**, giz005 (2019).
42. M. S. Campbell, M. Law, C. Holt, J. C. Stein, G. D. Moghe, D. E. Hufnagel, J. Lei, R. Achawanantakun, D. Jiao, C. J. Lawrence, D. Ware, S. H. Shiu, K. L. Childs, Y. Sun, N. Jiang, M. Yandell, MAKER-P: A tool kit for the rapid creation, management, and quality control of plant genome annotations. *Plant Physiol.* **164**, 513–524 (2014).

43. J. Jurka, V. V. Kapitonov, A. Pavlicek, P. Klonowski, O. Kohany, J. Walichiewicz, Repbase update, a database of eukaryotic repetitive elements. *Cytogenet. Genome Res.* **110**, 462–467 (2005).
44. D. Kim, G. Pertea, C. Trapnell, H. Pimentel, R. Kelley, S. L. Salzberg, TopHat2: Accurate alignment of transcriptomes in the presence of insertions, deletions and gene fusions. *Genome Biol.* **14**, R36 (2013).
45. M. G. Grabherr, B. J. Haas, M. Yassour, J. Z. Levin, D. A. Thompson, I. Amit, X. Adiconis, L. Fan, R. Raychowdhury, Q. Zeng, Z. Chen, E. Mauceli, N. Hacohen, A. Gnirke, N. Rhind, F. di Palma, B. W. Birren, C. Nusbaum, K. Lindblad-Toh, N. Friedman, A. Regev, Full-length transcriptome assembly from RNA-Seq data without a reference genome. *Nat. Biotechnol.* **29**, 644–652 (2011).
46. M. Stanke, B. Morgenstern, AUGUSTUS: A web server for gene prediction in eukaryotes that allows user-defined constraints. *Nucleic Acids Res.* **33**, W465–W467 (2005).
47. B. J. Haas, J. R. Wortman, C. M. Ronning, L. I. Hannick, R. K. Smith Jr, R. Maiti, A. P. Chan, C. Yu, M. Farzad, D. Wu, O. White, C. D. Town, Complete reannotation of the *Arabidopsis* genome: methods, tools, protocols and the final release. *BMC Biol.* **3**, 7 (2005).
48. C. Trapnell, A. Roberts, L. Goff, G. Pertea, D. Kim, D. R. Kelley, H. Pimentel, S. L. Salzberg, J. L. Rinn, L. Pachter, Differential gene and transcript expression analysis of RNA-seq experiments with TopHat and Cufflinks. *Nat. Protoc.* **7**, 562–578 (2012).
49. S. R. Eddy, HMMER user's guide (2010); <ftp://selab.janelia.org/pub/software/hmmer3/>.
50. Y. Wang, H. Tang, J. D. Debarry, X. Tan, J. Li, X. Wang, T. H. Lee, H. Jin, B. Marler, H. Guo, J. C. Kissinger, A. H. Paterson, MCScanX: A toolkit for detection and evolutionary analysis of gene synteny and collinearity. *Nucleic Acids Res.* **40**, e49 (2012).
51. L. Meisel, B. Fonseca, S. González, R. Baeza-Yates, V. Cambiazo, R. Campos, M. González, A. Orellana, J. Retamales, H. Silva, A rapid and efficient method for purifying high quality total RNA from peaches (*Prunus persica*) for functional genomics analyses. *Biol. Res.* **38**, 83–88 (2005).
52. R Core Team, R: A language and environment for statistical computing. (2018); [www.r-project.org/](http://www.r-project.org/).



53. R. Wehrens, L. M. C. Buydens, Self- and super-organizing maps in R: The kohonen Package. *J. Stat. Softw.* **21** (2007).
54. R. Kolde, pheatmap: Pretty Heatmaps (2019).
55. T. T. T. Dang, J. Franke, E. Tatsis, S. E. O'Connor, Dual catalytic activity of a cytochrome p450 controls bifurcation at a metabolic branch point of alkaloid biosynthesis in *Rauwolfia serpentina*. *Angew. Chem. Int. Ed.* **56**, 9440–9444 (2017).
56. J. X. Chin, B. K. Chung, D. Lee, Codon Optimization OnLine ( COOL ): a web-based multi-objective optimization platform for synthetic gene design. *Bioinformatics* **30**, 2210–2212 (2014).
57. K. Katoh, D. M. Standley, MAFFT multiple sequence alignment software version 7: Improvements in performance and usability article fast track. *Mol. Biol. Evol.* **30**, 772–780 (2013).
58. L. T. Nguyen, H. A. Schmidt, A. Von Haeseler, B. Q. Minh, IQ-TREE: A fast and effective stochastic algorithm for estimating maximum-likelihood phylogenies. *Mol. Biol. Evol.* **32**, 268–274 (2015).
59. S. Kalyaanamoorthy, B. Q. Minh, T. K. F. Wong, A. von Haeseler, L. S. Jermini, ModelFinder: Fast model selection for accurate phylogenetic estimates. *Nat. Methods* **14**, 587–589 (2017).
60. D. T. Hoang, O. Chernomor, A. Von Haeseler, B. Q. Minh, L. S. Vinh, UFBoot2: Improving the ultrafast bootstrap approximation. *Mol. Biol. Evol.* **35**, 518–522 (2017).
61. M. N. Price, P. S. Dehal, A. P. Arkin, FastTree 2—Approximately maximum-likelihood trees for large alignments. *PLOS ONE* **5**, e9490 (2010).
62. I. Letunic, P. Bork, Interactive Tree Of Life (iTOL) v4: Recent updates and new developments. *Nucleic Acids Res.* **47**, W256–W259 (2019).
63. J. T. Simpson, K. Wong, S. D. Jackman, J. E. Schein, S. J. M. Jones, I. Birol, ABySS: A parallel assembler for short read sequence data. *Genome Res.* **19**, 1117–1123 (2009).

64. A. Loytynoja, N. Goldman, Phylogeny-aware gap placement prevents errors in sequence alignment and evolutionary analysis. *Science* **320**, 1632–1635 (2008).
65. H. Ashkenazy, O. Penn, A. Doron-Faigenboim, O. Cohen, G. Cannarozzi, O. Zomer, T. Pupko, FastML: A web server for probabilistic reconstruction of ancestral sequences. *Nucleic Acids Res.* **40**, W580–W584 (2012).
66. Z. Yang, PAML 4: Phylogenetic analysis by maximum likelihood. *Mol. Biol. Evol.* **24**, 1586–1591 (2007).
67. Z. Yang, R. Nielsen, Mutation-selection models of codon substitution and their use to estimate selective strengths on codon usage. *Mol. Biol. Evol.* **25**, 568–579 (2008).
68. A. Stamatakis, RAxML version 8: A tool for phylogenetic analysis and post-analysis of large phylogenies. *Bioinformatics* **30**, 1312–1313 (2014).
69. S. A. Smith, B. C. O’Meara, TreePL: Divergence time estimation using penalized likelihood for large phylogenies. *Bioinformatics* **28**, 2689–2690 (2012).
70. M. J. Sanderson, Estimating absolute rates of molecular evolution and divergence times: A penalized likelihood approach. *Mol. Biol. Evol.* **19**, 101–109 (2002).
71. R. K. Kar, On the Indian origin of *Ocimum* (Lamiaceae): A palynological approach. *Palaeobotanist* **43**, 43–50 (1996).
72. G. Yao, B. T. Drew, T. S. Yi, H. F. Yan, Y. M. Yuan, X. J. Ge, Phylogenetic relationships, character evolution and biogeographic diversification of *Pogostemon* s.l. (Lamiaceae). *Mol. Phylogenet. Evol.* **98**, 184–200 (2016).
73. S. B. Janssens, E. B. Knox, S. Huysmans, E. F. Smets, V. S. F. T. Merckx, Rapid radiation of *Impatiens* (Balsaminaceae) during Pliocene and Pleistocene: Result of a global climate change. *Mol. Phylogenet. Evol.* **52**, 806–824 (2009).

74. M. J. Sanderson, r8s: inferring absolute rates of molecular evolution and divergence times in the absence of a molecular clock. *Bioinformatics* **19**, 301–302 (1996).
75. B. Li, P. D. Cantino, R. G. Olmstead, G. L. C. Bramley, C.-L. Xiang, Z.-H. Ma, Y.-H. Tan, D.-X. Zhang, A large-scale chloroplast phylogeny of the Lamiaceae sheds new light on its subfamilial classification. *Sci. Rep.* **6**, 34343 (2016).
76. B. O. Li, R. G. Olmstead, Two new subfamilies in Lamiaceae. *Phytotaxa* **313**, 222–226 (2017).
77. K. J. Vining, S. R. Johnson, A. Ahkami, I. Lange, A. N. Parrish, S. C. Trapp, R. B. Croteau, S. C. K. Straub, I. Pandelova, B. M. Lange, Draft genome sequence of *Mentha longifolia* and development of resources for mint cultivar improvement. *Mol. Plant* **10**, 323–339 (2017).
78. H. Xu, J. Song, H. Luo, Y. Zhang, Q. Li, Y. Zhu, J. Xu, Y. Li, C. Song, B. Wang, W. Sun, G. Shen, X. Zhang, J. Qian, A. Ji, Z. Xu, X. Luo, L. He, C. Li, C. Sun, H. Yan, G. Cui, X. Li, X. Li, J. Wei, J. Liu, Y. Wang, A. Hayward, D. Nelson, Z. Ning, R. J. Peters, X. Qi, S. Chen, Analysis of the genome sequence of the medicinal plant *Salvia miltiorrhiza*. *Mol. Plant* **9**, 949–952 (2016).
